# Supplementary material for: Slower maximal walking speed is associated with poorer global cognitive function among older adults residing in China
Source: PeerJ. 2022 Jul 26;10:e13809. doi: 10.7717/peerj.13809 (PMC9336608; doi:10.7717/peerj.13809)
Supplement: Data S1 [file peerj-10-13809-s001.xlsx]

## Sheet: Sheet1
name numbers	gender	age	height(m)	weight(kg)	BMI	hypertension	Diabetes	hyperlipemia	heart disease	years of education	education Score	Visual space and executive function	namming	attention	language	abstract reasoning	delayed recall, memory	orientation	MoCA scores	UWS	MWS
1	1	62	1.83	59.55	17.8	0	0	0	0	19	0	5	3	6	3	2	2	6	27	1.36	1.66
2	1	60	1.69	74.4	26.2	0	0	0	0	19	0	2	3	6	3	2	2	6	24	1.33	1.86
3	1	64	1.76	74.4	23.9	1	1	0	0	19	0	5	3	6	3	2	3	6	28	1.33	1.86
4	1	63	1.72	75	25.4	0	0	0	1	19	0	5	3	6	3	2	0	6	25	1.09	2
5	1	63	1.8	68.15	21	0	0	0	1	16	0	4	3	6	3	2	3	6	27	1.84	2.32
6	1	64	1.58	70.5	28.2	0	0	0	1	16	0	4	3	6	3	2	3	6	27	1.5	1.94
7	1	63	1.65	56.25	20.7	1	0	0	0	16	0	4	3	6	3	2	3	6	27	1.21	2.13
8	1	61	1.73	60.3	20.1	0	0	0	0	16	0	4	3	6	3	2	4	6	28	1.71	2.49
9	1	64	1.62	58.4	22.3	0	0	0	0	16	0	5	3	6	3	2	1	6	26	1.69	2.09
10	1	64	1.72	76.3	25.8	1	0	0	1	16	0	4	3	6	3	1	2	6	25	1.42	1.78
11	1	62	1.67	72.7	26.1	1	0	0	0	16	0	4	3	6	3	2	5	6	29	1.4	2.43
12	1	61	1.71	62.1	21.5	0	0	0	0	16	0	5	3	6	3	2	3	6	28	1.34	1.67
13	1	63	1.7	73.1	25.3	1	0	0	0	16	0	5	3	6	3	1	0	6	24	1.33	1.86
14	1	64	1.64	64.4	24.2	0	0	0	1	16	0	4	3	6	3	2	4	6	28	1.33	1.86
15	1	64	1.7	80.95	28	0	0	0	0	16	0	3	3	3	3	0	2	5	19	1.32	1.67
16	1	64	1.63	64.15	24.1	1	0	0	0	16	0	5	3	6	3	2	2	6	27	1.27	2.11
17	1	64	1.8	79	24.4	1	0	0	0	16	0	5	3	6	3	2	3	6	28	1.2	2.22
18	1	61	1.71	61.75	21.1	0	0	0	0	12	1	5	3	5	2	2	4	6	28	1.73	1.76
19	1	63	1.7	50.9	17.6	0	0	0	0	12	1	5	3	5	3	2	4	6	29	1.68	2.17
20	1	64	1.61	51	19.5	0	1	0	0	12	1	4	3	6	3	1	2	6	26	1.61	2.23
21	1	64	1.78	71.05	22.4	0	0	0	0	12	1	5	3	6	3	2	1	6	27	1.51	2.52
22	1	63	1.62	62.05	23.6	1	0	0	0	12	1	4	3	6	3	1	2	6	26	1.34	1.71
23	1	61	1.68	69.8	24.7	1	0	0	0	12	1	4	3	6	2	2	3	6	27	1.33	1.94
24	1	61	1.65	75.1	27.5	1	1	1	0	12	1	5	3	6	3	2	4	6	30	1.33	1.86
25	1	61	1.75	88	28.8	1	0	1	1	12	1	4	3	6	3	2	4	6	29	1.33	1.86
26	1	63	1.64	69	25.7	0	0	0	0	12	1	4	3	5	3	1	1	6	24	1.32	1.6
27	1	62	1.63	68.35	26.7	0	1	0	0	12	1	5	2	6	3	2	0	6	25	1.29	1.51
28	1	63	1.76	70.9	22.4	1	1	0	0	12	1	4	3	4	3	2	3	5	25	1.28	1.86
29	1	64	1.84	77.65	22.9	0	0	0	0	12	1	2	3	3	3	0	0	6	18	1.22	1.97
30	1	64	1.66	71.9	26.1	1	0	0	0	12	1	5	3	5	3	1	4	6	28	1.2	1.59
31	1	64	1.7	61.45	21.3	0	1	0	0	12	1	3	3	4	1	2	1	4	19	1.19	1.4
32	1	63	1.83	87.5	26.1	1	1	0	1	12	1	5	3	6	3	2	4	6	30	1.16	1.61
33	1	62	1.71	77.1	26.4	1	0	0	1	12	1	5	3	6	3	1	1	6	26	1.14	1.6
34	1	61	1.62	62.6	24	0	0	0	0	12	1	4	3	5	3	2	4	6	28	1.14	1.85
35	1	62	1.76	70.6	23.4	1	0	0	0	12	1	5	3	6	3	2	4	6	30	1.13	1.57
36	1	60	1.68	64.9	23	0	0	0	0	12	1	5	3	6	3	1	5	6	30	1.11	1.3
37	1	63	1.73	73.8	24.7	1	0	0	0	12	1	5	3	6	3	2	5	6	30	0.79	1.5
38	1	62	1.71	84.75	29	1	0	0	0	9	1	5	3	6	1	0	5	6	27	1.76	2.52
39	1	64	1.65	64.8	23.8	0	0	0	1	9	1	5	3	5	2	1	3	5	25	1.45	2.09
40	1	62	1.69	69.4	24.3	0	1	0	0	9	1	3	3	6	3	1	3	6	26	1.41	2.04
41	1	64	1.79	86.4	27	1	0	0	1	9	1	2	3	6	2	1	0	6	21	1.37	1.66
42	1	62	1.67	63.8	22.6	1	0	1	0	9	1	5	3	6	3	2	4	6	30	1.33	1.86
43	1	61	1.72	74.4	25.1	1	0	1	0	9	1	4	3	6	2	1	4	5	26	1.3	1.95
44	1	62	1.82	90.75	27.4	0	0	0	0	9	1	5	3	6	3	1	3	6	28	0.99	1.17
45	1	63	1.76	68.2	22	0	0	0	0	9	1	4	3	6	3	2	4	6	29	0.59	0.75
46	1	63	1.61	62.95	24.3	0	0	0	0	6	1	4	3	4	1	1	3	6	23	1.43	1.96
47	1	62	1.71	73.9	25.2	1	0	0	0	0	1	4	3	6	3	2	1	6	26	1.3	1.85
48	1	69	1.74	69.9	23.4	0	0	0	0	22	0	3	3	6	3	2	1	5	23	1.42	2.03
49	1	67	1.74	64.9	21.7	0	0	0	0	19	0	5	3	6	3	2	3	6	28	1.79	2.27
50	1	65	1.52	59.35	24.7	0	0	0	0	19	0	5	3	6	3	2	4	6	29	1.78	2.08
51	1	68	1.66	57.2	20.8	0	0	0	0	19	0	5	3	6	3	1	5	5	28	1.49	1.7
52	1	66	1.66	69	24.8	0	0	0	1	19	0	5	3	6	3	1	3	6	27	1.32	1.51
53	1	68	1.76	71.95	24.9	0	0	0	0	19	0	5	3	6	3	2	5	6	30	1.16	1.93
54	1	66	1.75	68.55	22.4	1	0	0	0	16	0	4	3	6	3	2	3	6	27	1.28	1.71
55	1	69	1.7	64.75	22.4	0	0	0	0	16	0	4	3	6	3	2	3	6	27	1.19	1.41
56	1	67	1.67	60	21.5	0	0	0	0	16	0	4	3	6	3	2	3	6	27	1.01	1.51
57	1	66	1.71	84.05	28.7	0	0	0	0	16	0	4	3	6	3	2	3	6	27	0.9	1.2
58	1	67	1.71	69.65	23.8	1	0	0	0	16	0	4	3	6	2	2	5	6	28	1.63	2.04
59	1	69	1.62	67.4	25.9	1	0	0	0	16	0	5	3	6	3	2	4	6	29	1.61	2.32
60	1	67	1.72	76.55	25.9	1	0	0	0	16	0	3	2	4	3	2	0	6	20	1.57	2.17
61	1	65	1.79	72.55	22.6	1	1	0	0	16	0	5	3	5	3	2	3	6	27	1.52	2.42
62	1	66	1.69	88.7	31.1	1	0	1	0	16	0	3	3	6	3	2	5	6	28	1.34	2.12
63	1	67	1.64	64.85	24.1	0	1	1	0	16	0	5	3	6	3	2	3	6	28	1.32	1.74
64	1	67	1.7	64.25	22.2	0	0	0	0	16	0	5	3	6	3	2	2	6	27	1.24	1.56
65	1	69	1.77	77.3	24.7	1	0	0	0	16	0	5	3	4	3	2	4	6	27	1.22	1.82
66	1	68	1.73	73.9	25	1	0	0	0	16	0	5	3	6	3	2	4	6	29	0.98	1.19
67	1	69	1.8	79.2	24.7	1	0	0	0	16	0	5	3	6	3	2	1	6	26	0.88	1.21
68	1	68	1.64	69	25.7	1	0	0	0	12	1	4	3	5	3	1	4	6	27	1.73	1.91
69	1	68	1.67	54.5	19.5	0	0	0	0	12	1	3	3	5	2	2	1	6	23	1.51	1.67
70	1	65	1.59	51.15	20.2	0	0	0	0	12	1	3	3	5	2	2	4	5	25	1.48	2.11
71	1	65	1.72	95.7	32.3	1	0	0	0	12	1	5	3	6	2	2	5	6	30	1.48	1.92
72	1	66	1.7	70.95	24.6	0	0	0	0	12	1	5	3	5	3	1	3	6	27	1.47	2.14
73	1	68	1.68	72.4	25.9	0	0	0	0	12	1	5	3	6	3	2	2	6	28	1.47	2.14
74	1	68	1.73	86.5	28.9	0	1	1	1	12	1	3	3	5	3	0	3	6	24	1.45	1.74
75	1	67	1.68	63.75	22.6	0	0	0	0	12	1	5	3	6	3	2	4	5	29	1.43	1.63
76	1	66	1.7	74.9	25.9	0	0	0	0	12	1	5	3	6	3	2	5	6	30	1.42	1.89
77	1	68	1.68	68.75	24.4	0	0	0	0	12	1	5	3	6	3	2	4	6	30	1.41	1.91
78	1	68	1.79	68.65	21.4	0	0	0	0	12	1	5	3	6	3	2	1	6	27	1.41	1.98
79	1	68	1.64	61.7	22.9	1	0	0	0	12	1	4	3	4	3	0	0	6	21	1.38	1.66
80	1	65	1.6	74.05	28.9	0	0	0	0	12	1	4	3	6	3	2	3	6	28	1.35	1.67
81	1	65	1.69	70.85	24.8	0	0	0	0	12	1	5	3	5	3	2	0	6	25	1.29	2.11
82	1	69	1.7	65.3	22.8	0	0	0	0	12	1	0	3	5	3	2	0	2	16	1.28	1.71
83	1	67	1.69	65.4	22.9	1	0	0	0	12	1	4	3	5	3	2	5	6	29	1.26	1.64
84	1	65	1.72	72.45	24.5	0	0	0	0	12	1	5	2	6	3	1	3	6	27	1.25	1.75
85	1	66	1.75	79.4	25.9	0	0	0	0	12	1	5	3	6	2	2	1	6	26	1.25	1.7
86	1	69	1.67	57.75	20.7	0	0	0	0	12	1	4	3	5	3	2	4	6	28	1.13	1.37
87	1	65	1.75	69.6	22.7	1	0	0	0	12	1	5	3	6	2	1	2	6	26	1.1	1.81
88	1	66	1.7	64.8	23.8	1	1	0	0	12	1	2	3	5	2	0	1	5	19	1.1	1.79
89	1	67	1.72	71.75	24.3	0	0	1	0	12	1	5	3	6	3	2	2	6	28	1.06	2.17
90	1	66	1.72	72.05	24.4	1	0	0	1	12	1	4	3	6	3	1	2	6	26	0.9	1.23
91	1	69	1.69	61.5	21.6	1	0	1	0	12	1	4	2	6	2	2	2	6	25	0.86	1.2
92	1	68	1.74	79.9	28	1	1	1	1	9	1	5	3	6	3	2	5	6	30	1.57	1.9
93	1	68	1.71	67.6	23	0	0	0	0	9	1	3	3	4	3	2	2	5	23	1.56	1.88
94	1	67	1.7	62.25	21.5	1	1	0	0	9	1	5	3	6	2	2	2	6	27	1.54	2.14
95	1	69	1.7	69.9	24.2	1	0	0	0	9	1	4	3	6	3	2	3	6	28	1.4	1.92
96	1	66	1.71	80.2	27.2	1	0	1	1	9	1	5	3	6	3	2	2	6	28	1.38	1.88
97	1	69	1.56	63.86	26.2	1	0	0	1	9	1	5	3	6	3	2	3	6	29	1.35	1.5
98	1	68	1.64	68.85	23.6	1	0	1	1	9	1	5	3	5	3	2	2	6	27	1.3	1.74
99	1	66	1.65	62.9	23	1	1	1	0	9	1	2	3	4	3	2	2	6	23	1.28	1.71
100	1	69	1.65	91.9	33.8	1	1	0	0	9	1	4	3	6	2	1	4	5	26	1.26	1.46
101	1	67	1.72	68.45	23.1	0	0	0	0	9	1	3	3	6	1	0	0	6	20	1.22	1.46
102	1	69	1.68	62.1	21.7	0	0	0	1	9	1	5	3	6	3	2	5	6	30	1.2	1.96
103	1	69	1.7	64.75	22.4	1	0	0	0	9	1	5	2	5	2	1	2	6	24	1.19	1.41
104	1	68	1.67	69.5	24.9	1	0	0	0	9	1	4	3	5	3	2	2	6	26	1.12	1.62
105	1	69	1.67	68.35	24.5	1	0	1	0	9	1	4	3	6	3	2	2	6	27	1.05	1.08
106	1	69	1.69	70.75	25.1	1	0	1	1	9	1	0	3	6	3	1	3	6	23	1.04	1.51
107	1	65	1.72	57.6	19.7	0	0	0	0	9	1	4	3	6	3	2	3	6	28	0.99	1.2
108	1	66	1.68	78.85	27.9	1	0	0	0	9	1	3	3	6	3	2	2	6	26	0.95	1.13
109	1	69	1.66	102.9	37.3	1	0	1	0	9	1	5	3	6	3	2	4	6	30	0.87	1.29
110	1	68	1.68	59.15	21	1	0	0	0	9	1	5	3	6	2	1	3	6	27	0.85	1.31
111	1	68	1.77	65.45	20.9	1	0	0	0	9	1	5	3	6	3	2	1	6	27	0.84	1.15
112	1	69	1.68	65.25	23.1	1	0	0	1	9	1	5	3	6	3	2	4	6	30	0.57	0.9
113	1	67	1.7	72.7	25.2	0	0	0	1	6	1	3	2	5	3	1	3	6	24	1.6	1.9
114	1	67	1.69	73.05	25.6	1	0	0	0	6	1	2	3	6	2	1	0	5	20	1.44	1.94
115	1	71	1.79	69.25	21.6	0	0	0	0	19	0	5	3	6	3	2	5	6	30	1.69	2.11
116	1	74	1.63	55.9	21.3	0	0	0	0	19	0	4	3	6	3	2	4	6	28	1.25	1.96
117	1	74	1.74	81.4	27.2	1	0	0	0	19	0	4	3	5	1	2	3	6	24	1.12	1.5
118	1	73	1.71	59.55	20.4	0	0	0	0	19	0	5	3	6	2	2	5	6	29	1.05	1.9
119	1	71	1.68	79.9	28.1	0	0	0	0	16	0	4	3	6	3	1	3	6	26	1.57	2.16
120	1	72	1.65	62.4	22.8	0	1	0	0	16	0	4	3	6	2	0	4	6	25	1.28	1.59
121	1	71	1.67	85.3	30.9	1	1	1	0	16	0	4	3	6	3	1	3	6	26	1.2	1.66
122	1	72	1.71	61.7	21.1	1	0	0	0	16	0	4	3	6	3	1	3	6	26	1.2	1.66
123	1	73	1.72	76.45	25.8	1	0	0	0	16	0	4	3	6	3	1	3	6	26	1.2	1.66
124	1	72	1.68	69.66	24.7	0	0	0	0	16	0	4	3	6	3	1	3	6	26	1.01	1.38
125	1	73	1.71	73.7	25.2	0	1	0	1	16	0	5	3	4	3	2	5	6	28	1.38	1.95
126	1	72	1.68	58.7	20.5	0	0	0	0	16	0	2	3	5	2	0	2	5	19	1.22	1.62
127	1	72	1.58	63.8	25.8	0	0	0	0	16	0	5	2	6	3	2	2	6	26	1.2	1.66
128	1	72	1.77	78.4	24.8	1	0	1	0	16	0	5	3	6	2	2	1	5	24	1.2	2.26
129	1	70	1.7	77.45	26.8	1	0	0	0	16	0	2	2	6	3	1	1	6	21	1.1	1.61
130	1	71	1.66	56.3	20.4	1	0	0	0	16	0	5	3	6	3	2	1	6	26	1.08	1.44
131	1	70	1.65	61.1	22.2	1	0	0	0	16	0	5	3	6	3	2	3	6	28	1.07	1.37
132	1	72	1.7	71.1	24.4	0	0	1	0	16	0	2	3	3	3	1	0	6	18	0.9	1.26
133	1	72	1.68	68.7	24.3	0	1	0	0	16	0	5	3	6	3	2	5	5	29	0.82	1.04
134	1	74	1.7	87.6	30.3	1	1	0	0	12	1	4	3	6	3	1	5	6	29	1.59	2.11
135	1	72	1.67	57.95	21.5	1	0	0	1	12	1	5	3	6	3	2	5	6	30	1.52	1.85
136	1	73	1.71	60.95	20.8	0	0	0	0	12	1	5	3	6	3	1	4	6	29	1.49	1.95
137	1	70	1.85	80.9	23.6	0	0	0	0	12	1	5	3	6	3	2	5	6	30	1.46	2.02
138	1	74	1.67	66.75	23.9	1	1	0	1	12	1	4	3	6	2	2	2	6	26	1.39	2.28
139	1	72	1.68	60.4	20.9	0	0	0	1	12	1	5	3	6	3	2	3	6	29	1.38	2.25
140	1	73	1.71	78.9	27	1	0	0	0	12	1	3	3	4	3	2	5	6	27	1.32	1.92
141	1	71	1.69	86.8	30.8	0	0	0	0	12	1	5	3	6	3	1	3	5	27	1.28	1.64
142	1	74	1.64	63.45	23.6	1	0	0	1	12	1	5	3	6	2	1	0	6	24	1.2	1.66
143	1	74	1.69	52.15	18.3	0	1	0	0	12	1	4	3	6	1	2	1	6	24	1.05	1.28
144	1	73	1.72	84.25	28.5	1	1	1	0	12	1	3	1	5	3	1	4	6	24	1.01	1.54
145	1	73	1.72	67.7	22.7	1	1	1	1	12	1	3	3	6	3	2	1	6	25	1	1.53
146	1	72	1.76	87.25	28.2	1	1	0	1	12	1	4	2	6	3	2	4	6	28	1	1.25
147	1	71	1.74	74.75	24.7	0	0	1	0	12	1	3	3	6	3	1	4	6	27	0.98	1.21
148	1	71	1.61	62.8	25.4	0	0	1	0	12	1	5	1	6	3	1	0	6	23	0.84	1.09
149	1	70	1.7	70.3	24.3	0	0	0	0	9	1	4	3	6	3	2	5	6	30	1.8	2.52
150	1	71	1.7	71.55	24.8	1	0	0	0	9	1	5	3	6	1	1	0	6	23	1.52	2.11
151	1	72	1.63	60.85	23.2	0	0	0	1	9	1	5	3	4	3	2	2	6	26	1.45	1.92
152	1	73	1.66	71.9	26.1	0	0	0	0	9	1	5	3	6	3	2	5	6	30	1.43	2.1
153	1	71	1.78	71.1	22.4	1	0	0	1	9	1	4	3	6	3	2	1	6	26	1.35	1.82
154	1	72	1.61	61.95	23.9	1	1	0	1	9	1	3	3	5	2	2	3	6	25	1.35	1.78
155	1	74	1.7	95.5	32.9	1	0	1	1	9	1	3	3	6	2	1	3	6	25	1.29	1.75
156	1	74	1.63	60.15	22.6	1	0	0	1	9	1	3	3	6	3	1	2	6	25	1.27	1.82
157	1	74	1.62	62.8	23.9	0	0	0	0	9	1	2	3	6	3	1	1	6	23	1.23	1.52
158	1	70	1.6	55.3	21.2	1	0	1	1	9	1	2	0	6	2	1	0	6	18	1.2	1.66
159	1	72	1.57	59.15	24	0	1	0	1	9	1	5	2	6	3	1	2	6	26	1.2	1.66
160	1	74	1.6	55.6	21.7	1	1	0	0	9	1	5	3	6	2	2	0	6	25	1.2	1.46
161	1	72	1.57	64.75	26.3	1	0	0	0	9	1	1	2	3	2	0	0	1	10	1.18	1.55
162	1	71	1.53	58.7	25.1	0	0	0	0	9	1	5	3	5	3	2	3	6	28	1.17	1.52
163	1	71	1.69	68.45	24	0	0	0	0	9	1	5	3	6	3	2	3	6	29	1.17	1.65
164	1	72	1.75	68.05	22.2	1	1	0	1	9	1	3	3	6	3	2	4	6	28	1.15	1.62
165	1	70	1.64	78.65	29.2	1	0	0	0	9	1	4	3	6	3	2	1	6	26	1.15	1.38
166	1	70	1.65	63.8	23.9	0	0	1	1	9	1	3	3	6	3	1	3	6	26	1.07	1.6
167	1	72	1.71	84.85	29.4	1	1	0	0	9	1	4	3	6	3	1	3	6	27	1	1.19
168	1	70	1.73	75.75	25.3	0	0	0	0	9	1	5	3	6	3	1	1	5	25	0.98	1.21
169	1	71	1.63	50.8	19.1	1	0	0	0	9	1	4	2	6	3	0	5	5	26	0.93	1.21
170	1	72	1.75	78.85	25.7	1	0	0	0	9	1	5	3	6	3	2	4	6	30	0.86	1.17
171	1	71	1.67	87.4	31.3	1	1	0	0	9	1	2	3	6	1	1	0	6	20	0.73	0.91
172	1	72	1.68	70.5	25	1	0	0	0	0	1	5	3	6	3	2	4	6	30	1.28	2
173	1	70	1.69	79.7	27.9	1	1	1	0	0	0	5	3	6	2	1	2	6	25	1.01	1.37
174	1	79	1.79	82.6	26.1	0	0	1	0	19	0	5	3	6	3	2	5	6	30	1.6	2.22
175	1	79	1.77	80.2	25.6	1	0	0	0	19	0	5	3	5	3	2	2	6	26	1.39	2.04
176	1	75	1.7	59.55	20.9	0	0	0	0	19	0	5	3	4	3	2	2	6	25	1.37	1.83
177	1	78	1.76	81	26.1	1	0	0	0	19	0	5	3	6	3	2	5	6	30	1.3	2.13
178	1	75	1.73	72.45	24.2	1	0	0	0	19	0	3	3	6	3	2	4	6	27	1.28	2.08
179	1	75	1.71	73.55	25.2	0	1	0	0	19	0	4	3	5	3	2	3	6	26	1.27	1.34
180	1	78	1.71	68.55	23	1	0	0	0	19	0	5	3	6	3	2	5	6	30	1.25	1.68
181	1	76	1.76	52.45	17.1	0	0	0	0	19	0	5	3	6	3	2	4	6	29	1.21	1.56
182	1	77	1.7	66.85	23.1	0	0	0	1	19	0	3	3	6	2	2	3	6	25	0.96	1.3
183	1	76	1.76	76.1	24.6	0	0	0	0	19	0	5	3	6	3	2	3	6	28	0.85	1.42
184	1	76	1.57	75.9	30.8	1	1	0	0	19	0	5	3	6	3	2	2	6	27	0.68	0.77
185	1	75	1.63	67.5	25.3	0	0	0	1	16	0	4	3	6	2	2	2	6	25	1.81	2.04
186	1	76	1.65	78.85	29	1	0	0	0	16	0	4	3	5	3	2	3	6	26	1.43	1.87
187	1	76	1.65	78.85	29	1	0	0	0	16	0	4	3	5	3	2	3	6	26	1.43	1.87
188	1	75	1.63	69.6	26.1	1	0	1	0	16	0	4	3	5	3	2	3	6	26	1.07	1.23
189	1	79	1.69	80	28.8	1	0	0	1	16	0	1	3	5	2	2	3	6	22	0.76	1.07
190	1	75	1.66	66.7	24.3	1	1	0	0	16	0	4	3	5	3	2	1	6	24	1.08	1.46
191	1	77	1.72	62.05	21.2	1	0	0	0	16	0	4	3	5	3	1	1	6	23	0.97	1.55
192	1	75	1.66	72.45	26.3	0	0	0	0	12	1	4	3	5	3	1	5	6	28	1.64	2.16
193	1	77	1.59	63.25	25	0	1	0	0	12	1	5	3	6	3	2	4	6	30	1.29	1.92
194	1	76	1.68	78.05	27.7	1	0	0	1	12	1	5	3	6	3	2	3	6	29	1.19	1.69
195	1	79	1.71	68.05	23.3	1	1	1	1	12	1	5	3	6	2	2	2	6	27	1.08	1.3
196	1	75	1.7	78.6	27.2	1	1	0	1	12	1	5	3	6	2	2	4	5	28	1.04	1.39
197	1	77	1.68	81.95	29	1	1	0	0	12	1	5	3	5	3	2	4	6	29	0.95	1.35
198	1	79	1.7	62.75	21.7	1	0	0	1	9	1	4	3	6	3	2	3	6	28	1.76	2.18
199	1	76	1.77	89.2	28.5	1	1	1	1	9	1	5	3	5	2	2	3	6	27	1.55	2.28
200	1	75	1.58	41.9	17	0	0	0	0	9	1	5	2	5	3	1	4	5	26	1.15	1.22
201	1	75	1.73	81.25	27.1	1	0	0	0	9	1	5	3	6	3	2	3	6	29	1.1	1.44
202	1	77	1.75	59.75	19.5	0	0	0	0	9	1	5	3	5	2	2	1	4	23	1.05	1.5
203	1	78	1.72	83.75	28.3	0	0	0	0	9	1	3	3	4	3	2	4	6	26	0.97	1.08
204	1	79	1.63	52.25	19.7	0	0	0	0	6	1	5	3	5	2	0	4	6	26	1.54	1.73
205	1	83	1.73	86.4	28.9	0	0	0	0	19	0	4	3	5	2	2	1	6	23	1.6	1.9
206	1	81	1.73	65.3	21.8	1	0	0	1	19	0	5	3	6	3	2	4	6	29	1.46	1.91
207	1	82	1.71	62.8	21.5	0	0	0	0	19	0	5	3	6	3	2	3	6	28	1.39	1.88
208	1	81	1.64	61.95	23	1	0	0	1	19	0	5	2	6	3	2	3	6	27	1.38	1.85
209	1	82	1.68	66.1	23.4	0	0	0	1	19	0	4	3	6	3	2	0	6	24	1.26	1.66
210	1	83	1.74	60.7	20.3	0	0	0	1	19	0	3	3	6	3	2	2	5	24	1.2	1.76
211	1	80	1.63	67.5	25.5	1	0	0	0	19	0	5	3	5	1	2	4	6	26	1.09	1.38
212	1	80	1.63	67.5	25.5	1	0	0	0	19	0	5	3	5	1	2	4	6	26	1.09	1.38
213	1	82	1.64	69.85	26	0	0	0	0	19	0	4	3	6	3	2	1	6	25	1.07	1.42
214	1	80	1.7	66.2	22.9	1	0	0	1	19	0	5	3	6	3	2	4	6	29	0.77	1.42
215	1	80	1.7	66.2	22.9	1	0	0	1	19	0	5	3	6	3	2	4	6	29	0.77	1.42
216	1	84	1.58	69	27.7	0	1	0	0	19	0	3	2	5	3	1	0	6	20	0.69	0.93
217	1	84	1.76	61.85	20.2	0	0	0	0	16	0	3	3	5	3	1	1	6	22	0.98	1.53
218	1	84	1.8	73.8	22.8	0	0	0	0	16	0	3	2	4	3	2	1	6	21	1.74	2.09
219	1	84	1.8	73.8	22.8	0	0	0	0	16	0	3	2	4	3	2	1	6	21	1.74	2.09
220	1	84	1.69	60.25	21.9	1	1	0	1	16	0	5	3	6	2	1	2	6	25	1.35	1.72
221	1	84	1.69	60.25	21.9	1	1	0	1	16	0	5	3	6	2	1	2	6	25	1.35	1.72
222	1	80	1.7	58	20.1	0	0	0	0	16	0	4	2	5	3	1	0	3	18	1.26	1.71
223	1	81	1.64	74.6	27.7	1	0	0	0	16	0	4	3	3	3	2	4	5	24	0.82	1.21
224	1	84	1.82	71.45	21.8	1	0	0	0	12	1	5	3	6	3	2	3	6	29	1.48	1.88
225	1	83	1.55	55.5	23.1	0	0	0	1	12	1	2	1	5	3	0	0	6	18	1.43	1.64
226	1	83	1.55	55.5	23.1	0	0	0	1	12	1	2	1	5	3	0	0	6	18	1.43	1.64
227	1	80	1.55	52.75	22.2	0	0	0	1	12	1	4	3	5	3	2	1	6	25	1.24	1.88
228	1	84	1.72	83.45	26.9	1	1	0	1	12	1	3	3	6	3	1	1	6	24	1.02	1.24
229	1	82	1.61	60	23.1	0	0	0	0	12	1	5	3	6	3	2	3	6	29	0.86	0.99
230	1	82	1.57	62.4	25.2	0	0	0	1	9	1	3	4	4	2	2	0	5	21	1.28	1.6
231	1	81	1.7	74.2	25.7	0	0	0	0	9	1	3	3	4	3	2	0	6	22	1.26	1.5
232	1	81	1.7	74.2	25.7	0	0	0	0	9	1	3	3	4	3	2	0	6	22	1.26	1.5
233	1	83	1.67	63.65	22.8	0	0	0	0	9	1	5	3	6	2	2	2	6	27	1.07	1.59
234	1	84	1.69	76.9	26.9	1	0	0	0	9	1	3	3	4	2	2	2	6	23	0.83	1.12
235	1	80	1.55	59.6	24.6	1	1	1	0	6	1	0	2	2	0	2	0	4	11	1.21	1.59
236	1	88	1.62	64.9	25	1	0	0	0	19	0	3	3	6	2	2	1	6	23	1.52	1.67
237	1	85	1.71	72.4	24.8	1	0	0	0	19	0	5	3	6	3	2	3	6	28	0.82	1.12
238	1	85	1.7	63.9	22.1	1	0	0	0	19	0	3	3	6	3	2	3	6	26	0.76	0.98
239	1	88	1.72	72.35	24.5	0	0	0	0	16	0	3	0	6	2	2	1	6	20	0.71	1.31
240	1	85	1.57	55.6	22.6	1	0	0	0	16	0	3	3	6	3	2	3	6	26	0.6	0.73
241	1	87	1.73	69.7	22.4	1	0	0	0	16	0	3	2	4	1	1	2	6	19	1.28	1.7
242	1	87	1.68	63.4	22.5	1	1	0	0	16	0	5	3	6	2	2	4	6	28	0.98	1.65
243	1	87	1.69	65.5	22.8	1	1	0	0	16	0	5	3	6	3	2	1	6	26	0.72	0.95
244	1	88	1.55	61.9	25.7	0	0	0	0	16	0	0	1	6	3	1	0	6	17	0.6	0.73
245	1	86	1.69	65.55	23.2	0	0	0	0	12	1	4	3	6	3	2	2	6	27	1.08	1.49
246	1	88	1.64	57.55	21.7	0	0	0	1	9	1	2	3	6	2	2	3	6	25	1.1	1.44
247	1	86	1.62	70.15	26.7	1	1	0	0	9	1	3	3	2	2	0	1	5	17	0.97	1.85
248	1	86	1.62	70.15	26.7	1	1	0	0	9	1	3	3	2	2	0	1	5	17	0.97	1.85
249	1	87	1.66	69	25.1	1	0	0	1	9	1	3	3	6	3	2	3	6	27	0.82	1.1
250	1	87	1.68	73.5	26	0	1	0	0	9	1	0	1	3	2	0	0	6	13	0.81	0.89
251	1	86	1.65	60	22	0	0	0	0	9	1	2	3	5	3	2	3	5	24	0.66	1.09
252	1	86	1.6	58.25	22.8	0	0	0	0	0	1	1	2	1	1	0	1	3	10	0.66	0.78
253	2	64	1.56	56.6	23.3	1	0	0	0	22	0	4	3	6	3	2	4	6	28	1.52	1.82
254	2	63	1.6	54.6	21.3	0	0	0	0	19	0	5	3	6	3	2	4	6	29	1.57	2
255	2	62	1.7	62.6	21.7	0	0	0	0	19	0	4	3	5	3	2	4	6	27	1.41	1.76
256	2	62	1.61	64.8	24.8	0	0	0	0	19	0	4	3	6	3	2	5	6	29	1.33	1.72
257	2	62	1.61	53.9	20.8	0	0	0	1	16	0	4	3	6	3	1	3	6	26	1.45	1.8
258	2	61	1.55	49.15	20.5	0	0	0	0	16	0	4	3	6	3	1	3	6	26	1.33	1.72
259	2	61	1.63	55	20.7	0	0	0	0	16	0	4	3	6	3	1	3	6	26	1.33	1.72
260	2	64	1.59	56.65	22.4	1	0	0	0	16	0	4	3	6	3	1	3	6	26	1.3	1.72
261	2	61	1.63	66.95	25.2	1	0	0	0	16	0	4	3	6	3	1	3	6	26	1	1.23
262	2	64	1.58	54.15	21.7	0	0	0	0	16	0	4	3	6	3	1	3	6	26	0.95	1.34
263	2	60	1.6	68.4	26.7	1	0	0	1	16	0	4	3	6	3	1	3	6	26	0.85	0.95
264	2	62	1.54	66.05	27.9	0	0	1	0	16	0	4	3	6	3	1	3	6	26	0.76	0.96
265	2	61	1.63	57.15	21.5	0	0	0	0	16	0	5	2	5	2	1	5	6	26	1.69	1.92
266	2	62	1.59	52.5	20.8	0	0	0	0	16	0	5	3	6	2	2	5	6	29	1.55	1.71
267	2	62	1.58	45.45	18.2	0	0	0	0	16	0	4	3	6	3	2	3	6	27	1.49	1.76
268	2	61	1.57	60.5	24.9	0	0	1	0	16	0	5	3	6	3	1	5	6	29	1.4	2.17
269	2	64	1.57	53.4	21.7	0	0	0	0	16	0	4	3	6	3	2	5	6	29	1.37	1.88
270	2	60	1.62	59.8	22.9	0	0	1	0	16	0	5	3	5	3	2	5	6	29	1.33	1.72
271	2	64	1.58	58.95	23.6	1	1	0	0	16	0	5	3	6	3	2	5	6	30	1.29	1.68
272	2	62	1.56	57.7	23.7	0	0	0	0	16	0	4	3	6	3	1	4	6	27	1.27	1.86
273	2	64	1.54	64.25	30.6	1	0	0	0	16	0	5	3	6	3	2	5	6	30	1.14	1.55
274	2	62	1.66	62.75	22.8	1	1	1	1	16	0	4	3	6	3	2	4	6	28	1.1	1.44
275	2	62	1.6	66.65	26	0	1	0	0	16	0	5	3	6	3	2	4	6	29	1.04	1.61
276	2	63	1.62	60.85	23.8	1	0	1	0	16	0	4	2	6	3	1	3	6	25	1.04	1.19
277	2	64	1.6	66	25.8	1	0	0	0	12	1	1	2	5	1	1	3	6	20	1.92	2.52
278	2	61	1.64	61.9	23	0	1	0	0	12	1	2	3	5	3	2	3	6	25	1.88	2.14
279	2	62	1.61	55.65	21.5	1	0	1	0	12	1	5	3	6	3	2	1	6	27	1.71	2.14
280	2	63	1.68	61.05	21.6	0	1	0	0	12	1	5	3	6	3	2	5	6	30	1.65	2.14
281	2	61	1.55	60.9	25.3	0	0	0	0	12	1	5	3	6	3	1	4	5	28	1.64	1.76
282	2	63	1.59	61.2	24.2	0	1	0	1	12	1	3	3	6	3	2	4	6	28	1.62	1.71
283	2	61	1.62	68.1	25.9	1	0	0	0	12	1	4	3	6	1	0	4	6	25	1.6	2.16
284	2	62	1.64	70.2	26.1	0	0	1	0	12	1	5	3	6	3	2	2	6	28	1.6	1.94
285	2	62	1.58	59.2	23.7	0	0	0	0	12	1	2	3	6	3	2	0	6	23	1.57	2.04
286	2	64	1.57	58.65	23.8	1	0	1	1	12	1	1	3	6	1	1	3	5	21	1.56	1.81
287	2	60	1.59	52.2	20.6	0	0	0	0	12	1	5	3	6	3	2	3	6	29	1.55	1.94
288	2	64	1.61	73.7	28.4	0	0	1	1	12	1	2	3	6	3	0	2	6	23	1.53	2.06
289	2	63	1.57	60.8	24.7	0	0	1	0	12	1	4	3	5	3	2	3	6	27	1.5	1.79
290	2	61	1.63	49.15	18.7	0	0	0	0	12	1	4	2	5	3	1	4	6	26	1.49	1.73
291	2	63	1.59	54.5	21.6	0	0	1	0	12	1	4	3	6	3	1	4	6	28	1.48	1.65
292	2	64	1.57	53.7	21.6	0	0	0	1	12	1	0	2	6	3	2	3	6	23	1.47	2.17
293	2	63	1.66	59.45	21.8	1	1	0	1	12	1	2	1	5	2	0	2	6	19	1.47	2.43
294	2	61	1.62	65.85	25.1	0	0	1	0	12	1	5	3	6	2	1	4	5	27	1.46	1.67
295	2	63	1.6	50.85	19.9	0	0	0	1	12	1	5	3	6	3	1	2	6	27	1.45	2.36
296	2	61	1.61	53.9	20.8	0	0	0	1	12	1	5	3	6	3	1	4	6	29	1.45	1.8
297	2	60	1.62	60.15	23.5	1	1	1	1	12	1	5	3	6	3	1	3	6	28	1.44	1.89
298	2	60	1.55	57.25	23.8	0	0	0	0	12	1	3	3	6	3	1	4	6	27	1.42	1.7
299	2	63	1.64	67.65	25.1	0	0	0	0	12	1	5	3	6	3	2	5	6	30	1.41	1.79
300	2	64	1.7	52.5	18.2	0	0	1	0	12	1	5	3	6	3	2	5	6	30	1.41	1.69
301	2	64	1.52	57.9	24.8	1	0	0	0	12	1	4	3	3	2	0	3	6	22	1.41	1.67
302	2	63	1.62	53.45	20.4	0	0	0	0	12	1	5	3	6	3	2	3	6	29	1.4	1.73
303	2	60	1.51	49.75	21.8	0	0	0	1	12	1	5	3	3	3	1	3	6	25	1.39	2.01
304	2	63	1.66	51.55	18.7	0	0	0	0	12	1	4	1	6	1	0	0	6	19	1.38	1.85
305	2	61	1.62	63.6	24.2	0	0	1	1	12	1	4	1	6	3	0	2	6	23	1.37	1.52
306	2	63	1.68	64.85	23	0	0	0	0	12	1	4	3	4	3	0	4	6	25	1.37	1.72
307	2	63	1.63	48.2	18	0	0	0	0	12	1	4	2	6	3	1	3	6	26	1.37	1.65
308	2	61	1.61	53.7	20.7	1	0	0	0	12	1	5	3	6	3	0	5	6	29	1.37	1.54
309	2	64	1.57	56.45	22.9	1	0	0	0	12	1	5	3	6	3	1	5	6	30	1.36	1.76
310	2	62	1.58	66.05	26.5	1	0	0	0	12	1	5	3	6	2	1	3	6	27	1.36	1.69
311	2	60	1.63	70.2	26.4	0	0	0	1	12	1	4	3	6	3	0	5	6	28	1.35	1.89
312	2	64	1.5	48	21.4	0	0	0	0	12	1	4	3	3	3	2	3	6	25	1.35	1.58
313	2	64	1.66	62.15	22.5	0	0	1	0	12	1	4	3	6	2	2	5	6	29	1.33	1.63
314	2	60	1.61	86.4	33.6	0	1	0	0	12	1	4	3	6	3	2	1	6	26	1.33	1.72
315	2	61	1.67	72.2	26.3	0	0	0	1	12	1	5	3	6	3	1	2	5	26	1.33	1.72
316	2	62	1.59	57.8	22.8	0	0	0	0	12	1	4	3	6	3	2	4	6	29	1.33	1.72
317	2	62	1.59	55.4	22	0	0	0	0	12	1	5	2	5	2	0	2	6	23	1.33	1.72
318	2	63	1.48	49.6	22.1	0	0	0	0	12	1	5	3	5	3	0	5	6	28	1.32	1.83
319	2	60	1.55	54.3	22.6	1	0	0	0	12	1	5	3	6	3	2	2	6	28	1.31	1.73
320	2	60	1.63	55.5	20.9	0	0	0	0	12	1	4	3	5	3	1	3	6	26	1.31	1.71
321	2	62	1.59	55.4	22.2	0	0	0	0	12	1	5	3	6	3	2	3	6	29	1.3	1.75
322	2	60	1.61	57.45	22.2	0	0	0	0	12	1	5	3	6	3	1	4	6	29	1.29	1.81
323	2	61	1.7	63.55	22	1	1	0	0	12	1	4	3	6	2	1	1	6	24	1.28	1.64
324	2	60	1.67	65.3	23.7	1	0	0	0	12	1	3	2	6	3	2	5	6	28	1.27	2.02
325	2	64	1.61	63.25	24.4	0	0	0	0	12	1	4	3	5	2	0	0	6	21	1.27	1.5
326	2	62	1.55	54.05	22.5	0	0	0	0	12	1	5	3	6	3	0	5	6	29	1.27	2.04
327	2	64	1.6	66.1	25.8	1	0	0	0	12	1	4	3	6	3	2	5	6	30	1.27	1.65
328	2	60	1.61	61.5	23.7	1	0	0	1	12	1	3	3	4	3	2	2	6	24	1.27	1.66
329	2	64	1.52	52.25	22.6	1	1	0	1	12	1	5	3	6	3	1	4	6	29	1.26	1.68
330	2	63	1.58	65.75	26.3	1	0	1	0	12	1	3	3	5	3	2	4	6	27	1.24	1.81
331	2	62	1.73	81.5	27.2	1	1	0	0	12	1	4	3	6	2	1	2	6	25	1.21	1.79
332	2	63	1.58	65.85	26.4	1	0	0	0	12	1	5	3	6	3	2	2	6	28	1.2	1.81
333	2	64	1.63	67.85	25.5	0	1	0	1	12	1	4	2	6	3	2	3	6	27	1.19	1.73
334	2	61	1.46	42.5	19.9	0	1	0	0	12	1	4	3	6	3	0	2	6	25	1.18	1.31
335	2	62	1.57	76.75	31.5	0	0	0	0	12	1	5	3	6	3	2	3	6	29	1.05	1.2
336	2	63	1.63	61.95	23.3	1	0	0	0	12	1	5	3	6	3	2	4	6	30	1.04	1.3
337	2	62	1.63	58.6	22.3	0	0	0	0	12	1	5	2	6	3	2	4	6	29	1	1.53
338	2	64	1.53	56.75	24.2	0	1	0	0	12	1	5	3	5	3	2	5	6	30	0.99	1.27
339	2	61	1.57	66.15	26.8	0	0	0	0	12	1	4	3	5	2	1	5	6	27	0.95	1.22
340	2	61	1.58	53.1	21.5	0	0	0	0	12	1	2	2	6	3	1	4	6	25	0.95	1.24
341	2	63	1.54	55.55	23.7	1	0	0	0	12	1	5	3	6	3	2	4	6	30	0.91	1.65
342	2	63	1.62	71	27.1	1	0	1	0	12	1	3	3	6	3	2	3	6	27	0.91	1.1
343	2	60	1.63	56.2	21.2	0	0	0	0	12	1	3	3	4	2	1	4	6	24	0.9	1.13
344	2	64	1.56	56.55	23.2	0	0	0	0	12	1	3	3	6	3	1	0	6	23	0.89	1
345	2	60	1.53	53.55	22.9	1	0	0	0	12	1	5	3	6	3	1	1	6	26	0.88	2.16
346	2	61	1.63	51.6	19.7	0	0	0	0	12	1	3	1	6	3	0	3	6	23	0.85	1.02
347	2	64	1.6	47.85	18.7	0	0	0	0	12	1	3	2	5	1	0	1	6	19	0.84	1.04
348	2	62	1.63	57.65	21.7	1	1	0	0	9	1	2	2	2	1	0	1	6	15	1.92	2.25
349	2	64	1.58	51.35	20.6	0	1	0	0	9	1	4	2	5	3	0	0	5	20	1.92	2.03
350	2	62	1.56	50.9	20.9	0	0	0	0	9	1	2	3	6	3	2	2	6	25	1.7	1.81
351	2	61	1.58	63	25.3	1	0	0	0	9	1	5	2	6	2	1	1	6	24	1.63	1.73
352	2	63	1.6	58.2	22.7	0	0	0	0	9	1	5	3	5	3	1	3	6	27	1.57	1.74
353	2	62	1.61	57.2	22.1	1	0	0	0	9	1	5	3	6	3	0	4	6	28	1.57	1.64
354	2	62	1.63	56.4	21.2	0	0	0	0	9	1	4	3	3	3	2	3	6	25	1.52	1.91
355	2	61	1.52	66.05	28.6	1	1	0	0	9	1	5	0	5	3	1	2	6	23	1.51	1.9
356	2	60	1.65	71	26.1	0	0	0	0	9	1	4	3	6	2	1	0	5	22	1.5	2.21
357	2	60	1.61	68	26.6	1	0	1	1	9	1	2	3	4	3	2	0	6	21	1.48	1.71
358	2	63	1.54	58.5	24.7	0	0	0	0	9	1	5	3	6	3	1	5	6	30	1.47	1.92
359	2	63	1.63	61.4	23.1	1	0	0	1	9	1	4	2	6	3	2	1	5	24	1.45	2.08
360	2	63	1.65	51.25	19.3	0	0	0	1	9	1	4	3	6	3	1	5	6	29	1.45	1.97
361	2	64	1.57	50.1	20.3	1	0	0	0	9	1	3	2	6	1	1	3	6	23	1.44	1.79
362	2	63	1.55	61.55	25.6	1	0	0	0	9	1	4	3	5	3	0	3	6	25	1.41	1.94
363	2	64	1.58	61.05	24.5	0	0	0	0	9	1	4	3	6	3	0	2	6	25	1.4	1.9
364	2	63	1.6	62.5	24.4	0	0	0	0	9	1	5	3	6	3	0	4	6	28	1.39	1.64
365	2	60	1.51	52.4	23	0	1	0	0	9	1	2	3	6	3	1	0	6	22	1.33	1.72
366	2	62	1.54	57.8	24.3	0	0	0	0	9	1	5	3	6	3	2	4	6	30	1.31	1.69
367	2	62	1.65	81.6	32.2	1	1	1	1	9	1	3	3	4	2	2	2	6	23	1.31	1.65
368	2	64	1.59	60.9	24.4	1	0	0	0	9	1	4	3	4	2	1	4	6	25	1.28	1.74
369	2	63	1.53	53.95	23	1	0	0	0	9	1	4	2	4	3	1	2	6	23	1.23	1.56
370	2	63	1.61	53.6	20.7	0	0	1	0	9	1	4	3	4	3	1	5	6	27	1.18	1.85
371	2	60	1.55	67.9	24.1	1	0	0	0	9	1	3	3	4	3	2	2	6	24	1.17	1.76
372	2	63	1.56	48.55	19.9	0	0	0	0	9	1	4	3	6	3	1	4	6	28	1.15	2.2
373	2	62	1.53	50.05	21.4	0	1	0	0	9	1	4	0	6	2	1	3	5	22	1.14	1.5
374	2	63	1.54	50.5	21	0	0	0	0	9	1	4	3	6	3	1	4	6	28	0.92	1.61
375	2	61	1.51	74	32.5	0	0	0	0	9	1	2	3	4	3	0	2	6	21	0.88	1.09
376	2	63	1.56	50.75	20.9	0	0	0	0	9	1	4	2	6	2	2	3	6	26	0.88	1.1
377	2	63	1.52	56.95	25	1	0	0	0	6	1	4	2	5	2	1	0	6	21	1.33	1.72
378	2	63	1.51	55.4	24.3	1	1	0	0	6	1	3	2	5	2	2	1	6	22	1.22	1.85
379	2	64	1.51	69.8	30.6	1	0	0	0	6	1	5	3	6	3	1	4	6	29	1.21	1.58
380	2	69	1.59	60.65	24	0	0	0	0	19	0	5	3	6	3	2	4	6	29	1.55	1.81
381	2	68	1.63	61.85	23.3	0	1	0	0	19	0	4	3	6	3	2	5	6	29	1.5	2.03
382	2	67	1.62	60.5	23.1	1	0	0	0	19	0	5	3	6	3	2	5	6	30	1.29	1.58
383	2	67	1.55	38.65	16.1	0	0	0	0	19	0	5	3	6	3	1	5	6	29	1.25	1.64
384	2	67	1.62	63.25	24.1	1	0	0	0	19	0	3	3	6	3	0	4	6	25	1.25	1.51
385	2	68	1.52	54	23.4	0	0	0	1	19	0	5	3	6	3	2	5	6	30	1.17	1.61
386	2	69	1.58	61.2	24.5	0	0	0	0	19	0	5	3	6	3	2	5	6	30	1.04	1.24
387	2	68	1.62	55.1	21.1	1	0	0	0	16	0	4	3	6	3	1	3	6	26	1.74	2.1
388	2	66	1.6	65.2	25.5	0	0	0	0	16	0	4	3	6	3	1	3	6	26	1.69	1.92
389	2	69	1.53	60.9	26.9	1	0	1	0	16	0	4	3	6	3	1	4	6	27	1.33	1.81
390	2	66	1.56	53	21.8	1	0	1	0	16	0	3	3	6	3	2	5	6	28	1.27	1.83
391	2	69	1.55	53.4	21.4	0	0	0	0	16	0	4	2	6	3	2	5	6	28	1.23	1.73
392	2	67	1.57	53.95	21.9	0	0	0	1	16	0	4	3	6	3	1	3	6	26	1.23	1.62
393	2	67	1.53	59.15	25.3	0	0	1	0	16	0	4	3	6	3	1	3	6	26	1.23	1.8
394	2	65	1.53	63.1	27	0	0	1	0	16	0	4	3	6	3	1	3	6	26	1.08	1.35
395	2	66	1.58	69.6	27.9	1	1	0	0	16	0	4	3	6	3	1	3	6	26	1.03	1.46
396	2	68	1.51	48.3	21.5	0	1	0	1	16	0	4	3	6	3	1	3	6	26	1.01	1.24
397	2	67	1.62	65.25	24.9	1	0	1	0	16	0	4	3	6	3	1	3	6	26	0.87	1.15
398	2	67	1.59	55	21.4	0	0	0	1	16	0	4	3	6	3	1	3	6	26	0.83	1.14
399	2	65	1.55	46.05	19.2	0	0	0	0	16	0	4	3	6	3	2	3	6	27	1.82	2.29
400	2	65	1.61	62.05	23.9	1	0	0	0	16	0	3	3	4	3	2	3	6	24	1.67	2.08
401	2	65	1.57	67	27.2	1	0	0	0	16	0	5	2	6	3	2	4	6	28	1.53	1.89
402	2	66	1.57	43.25	17.5	0	0	1	0	16	0	4	3	6	3	2	2	6	26	1.49	1.9
403	2	65	1.59	55.25	21.9	1	0	0	1	16	0	3	3	6	3	2	5	6	28	1.49	2.23
404	2	65	1.51	51.7	22.7	0	0	0	0	16	0	5	3	6	3	1	2	6	26	1.48	1.78
405	2	69	1.6	38.9	15.4	1	0	0	0	16	0	4	3	6	3	2	4	6	28	1.41	1.81
406	2	68	1.56	52.95	22	0	0	0	0	16	0	5	3	6	3	2	5	6	30	1.4	1.7
407	2	69	1.52	64.35	27.9	1	0	0	0	16	0	4	3	6	3	2	4	6	28	1.39	1.73
408	2	67	1.58	59.7	23.9	0	0	0	0	16	0	5	3	6	3	2	4	5	28	1.32	1.58
409	2	67	1.6	65.35	25.5	1	0	1	1	16	0	5	3	6	3	1	2	6	26	1.32	1.5
410	2	65	1.51	64.9	28.5	0	0	0	0	16	0	4	3	5	2	2	0	6	22	1.31	1.7
411	2	67	1.6	64.6	25.2	1	0	0	0	16	0	4	3	6	3	0	3	6	25	1.26	1.76
412	2	67	1.65	57.8	21.1	0	1	0	0	16	0	5	3	6	3	2	5	6	30	1.23	1.62
413	2	65	1.5	47.65	21.2	0	0	0	0	16	0	5	3	6	3	1	4	6	28	1.2	1.43
414	2	66	1.48	43.8	20	0	1	1	0	16	0	4	3	6	2	2	4	6	27	1.15	1.51
415	2	68	1.58	58.45	23.4	1	0	0	0	16	0	2	3	6	3	2	5	6	27	1.08	1.36
416	2	66	1.72	59.1	20	0	0	1	0	16	0	4	3	5	3	2	2	6	25	1.07	1.77
417	2	69	1.65	63.55	23.6	0	0	0	0	16	0	4	3	6	3	1	2	6	25	1.02	1.25
418	2	66	1.6	58	22.3	0	0	1	0	16	0	4	3	6	3	2	3	6	27	0.95	1.35
419	2	67	1.6	47.5	18.6	1	0	0	0	16	0	5	3	6	3	2	5	6	30	0.85	1.86
420	2	69	1.62	59.9	23.1	0	0	1	0	16	0	4	3	5	3	1	4	6	26	0.79	1.19
421	2	68	1.54	50.1	20.9	1	0	1	0	12	1	4	3	6	3	2	2	5	26	1.53	1.78
422	2	67	1.6	67.75	26.5	1	0	0	0	12	1	2	3	5	3	1	3	5	23	1.52	1.85
423	2	67	1.6	67.75	26.5	1	0	0	0	12	1	4	2	6	1	1	2	6	23	1.52	1.85
424	2	65	1.63	59.8	22.6	1	0	1	0	12	1	5	3	6	3	1	1	6	26	1.5	2.05
425	2	67	1.5	50.1	22	1	0	1	0	12	1	4	2	6	3	2	3	6	27	1.49	1.59
426	2	66	1.6	64.3	25.1	0	0	0	0	12	1	5	3	6	3	0	5	6	29	1.48	1.89
427	2	66	1.63	53.8	20.2	0	0	0	0	12	1	5	3	6	3	1	5	6	30	1.46	2.07
428	2	67	1.62	49.3	18.8	0	0	0	0	12	1	5	3	6	3	1	2	6	27	1.45	1.64
429	2	65	1.54	46.2	19.7	0	0	0	0	12	1	4	3	5	3	1	2	5	24	1.44	1.71
430	2	66	1.66	60.75	22	0	0	0	0	12	1	5	3	6	3	2	5	6	30	1.42	1.71
431	2	65	1.56	65.25	28.2	1	0	0	1	12	1	3	2	5	3	1	4	6	25	1.41	2.01
432	2	65	1.7	73.7	25.5	0	0	0	0	12	1	3	3	5	3	2	3	6	26	1.41	1.91
433	2	65	1.61	59.45	22.9	0	0	0	0	12	1	5	3	6	3	1	3	6	28	1.4	1.81
434	2	65	1.7	67.25	23.3	1	0	1	0	12	1	5	3	4	3	2	5	6	29	1.4	1.8
435	2	65	1.61	66	25.5	0	0	0	0	12	1	5	3	4	3	2	4	6	28	1.4	1.76
436	2	65	1.7	57.25	19.8	0	0	0	0	12	1	4	1	6	3	2	2	6	25	1.39	1.88
437	2	66	1.58	54.7	21.7	1	0	1	1	12	1	5	3	6	3	2	5	6	30	1.39	1.69
438	2	65	1.58	56.9	22.8	0	0	0	0	12	1	5	3	6	3	2	5	6	30	1.35	1.9
439	2	65	1.56	61.45	25.3	1	1	0	0	12	1	3	3	4	2	0	2	6	21	1.33	1.78
440	2	65	1.54	61.6	25.4	0	0	0	0	12	1	3	3	3	3	2	3	6	24	1.33	1.53
441	2	68	1.62	72.25	27.5	1	0	0	0	12	1	2	1	5	3	2	2	6	22	1.28	1.66
442	2	67	1.6	62.7	24.5	1	0	0	0	12	1	4	3	5	2	1	5	6	27	1.28	1.9
443	2	66	1.66	63.15	22.9	0	0	0	0	12	1	3	3	6	3	2	4	6	28	1.27	1.53
444	2	66	1.6	57.6	22.5	0	0	0	1	12	1	5	3	6	3	2	1	6	27	1.24	1.78
445	2	65	1.54	44.5	18.9	0	1	0	0	12	1	4	3	5	3	0	1	6	23	1.23	1.62
446	2	65	1.55	48.8	20.1	0	0	0	0	12	1	3	3	6	3	2	5	6	29	1.23	1.62
447	2	66	1.59	69.4	27.1	0	0	0	1	12	1	2	3	6	3	2	2	6	25	1.23	1.62
448	2	66	1.62	61.1	23.1	0	0	1	0	12	1	4	3	6	3	1	2	6	26	1.23	1.62
449	2	67	1.54	56.7	24	0	1	0	0	12	1	3	3	5	3	1	2	6	24	1.23	1.62
450	2	68	1.64	79.25	29.5	1	0	0	0	12	1	3	2	2	3	2	0	5	18	1.23	1.62
451	2	67	1.62	59.8	22.8	1	0	0	0	12	1	5	3	6	3	0	4	6	28	1.22	1.5
452	2	65	1.61	63.15	24.4	0	0	0	0	12	1	3	2	6	2	2	5	6	27	1.21	1.69
453	2	67	1.58	59.5	23.8	1	0	0	0	12	1	5	3	6	3	1	3	6	28	1.21	1.55
454	2	68	1.66	61.7	22.2	1	0	0	1	12	1	4	3	6	3	1	3	6	27	1.21	1.71
455	2	69	1.53	49.55	21.2	1	0	0	0	12	1	5	2	6	3	2	4	6	29	1.21	1.67
456	2	68	1.52	53	22.7	0	0	1	0	12	1	4	3	6	3	2	2	6	27	1.18	1.46
457	2	69	1.65	60.7	22.4	1	0	0	1	12	1	3	3	6	3	2	4	6	28	1.16	1.83
458	2	65	1.62	68.8	26.2	1	1	0	0	12	1	5	3	5	2	2	5	6	29	1.15	1.6
459	2	69	1.48	59.65	27.2	1	0	0	1	12	1	5	3	6	2	2	0	5	24	1.13	1.34
460	2	65	1.56	52.2	21.4	1	0	1	0	12	1	4	3	4	3	1	5	6	27	1.13	1.52
461	2	67	1.64	50.75	18.9	0	0	1	1	12	1	5	3	6	3	2	4	6	30	1.12	1.99
462	2	65	1.64	80.45	29.9	1	1	0	0	12	1	4	1	5	3	1	3	6	24	1.05	1.35
463	2	68	1.55	73.3	30.5	0	0	0	0	12	1	3	3	6	2	1	3	6	25	1	1.2
464	2	68	1.62	53.5	20.4	0	0	0	0	12	1	5	2	6	2	2	4	6	28	0.99	1.2
465	2	69	1.58	57.35	23	1	0	0	1	12	1	4	3	6	3	2	4	6	29	0.99	1.08
466	2	65	1.6	63.25	24.7	0	0	1	0	12	1	3	3	6	3	1	2	6	25	0.98	1.15
467	2	68	1.55	44.6	18.6	0	0	0	0	12	1	3	3	6	3	1	4	6	27	0.95	1.36
468	2	65	1.54	52.6	22.2	1	0	1	0	12	1	4	3	6	3	2	4	6	29	0.95	1.2
469	2	67	1.53	54	23.1	1	0	0	0	12	1	4	3	6	2	1	4	6	27	0.89	1.09
470	2	66	1.55	74.8	31.5	0	0	0	0	12	1	5	2	6	3	1	4	6	28	0.85	1.18
471	2	68	1.61	62.2	24	1	0	0	1	12	1	5	3	6	3	2	4	6	30	0.81	1.38
472	2	66	1.55	49.35	20.5	0	1	0	0	12	1	5	2	6	3	2	0	6	25	0.81	0.91
473	2	66	1.55	62.05	25.8	1	0	0	0	12	1	4	3	6	3	2	4	6	29	0.78	1.45
474	2	69	1.59	51.55	20.4	1	0	1	1	12	1	3	3	4	3	1	2	6	23	0.72	1.08
475	2	65	1.58	55.05	22.2	0	0	0	0	9	1	4	3	6	3	2	4	6	29	1.72	2.46
476	2	65	1.7	64	22.1	1	0	0	0	9	1	5	3	6	3	2	3	6	29	1.69	2.01
477	2	65	1.58	63.9	25.6	1	1	0	0	9	1	4	3	6	3	1	3	6	27	1.69	1.99
478	2	67	1.58	56.2	22.5	1	0	0	1	9	1	5	3	6	2	2	5	6	30	1.67	1.92
479	2	66	1.62	69.95	27	1	0	0	1	9	1	2	3	6	3	0	4	6	25	1.62	1.86
480	2	69	1.61	53.5	20.6	0	0	0	0	9	1	5	2	5	3	2	3	6	27	1.57	1.81
481	2	66	1.7	66.2	22.9	0	0	0	0	9	1	5	3	6	3	2	3	6	29	1.57	2.09
482	2	67	1.57	48.1	19.5	0	0	0	0	9	1	5	3	5	3	2	2	6	27	1.55	1.79
483	2	68	1.58	62.5	25	1	0	0	0	9	1	5	1	5	2	2	3	6	25	1.54	1.71
484	2	65	1.55	60.2	25.8	0	0	0	0	9	1	5	3	6	2	1	2	6	26	1.53	1.9
485	2	65	1.55	56.75	23.6	0	0	0	0	9	1	3	3	5	1	0	4	6	23	1.52	2
486	2	69	1.6	73.1	28.6	1	0	0	0	9	1	5	3	6	3	1	1	6	26	1.5	1.78
487	2	65	1.58	64.05	25.7	0	0	0	0	9	1	4	1	6	3	2	4	6	27	1.45	1.52
488	2	66	1.5	62.8	27.9	1	1	0	0	9	1	3	1	3	0	1	1	5	15	1.44	1.56
489	2	69	1.54	54.9	23.1	0	0	0	0	9	1	4	3	5	3	1	4	6	27	1.43	1.79
490	2	67	1.65	60.35	21.4	0	0	0	0	9	1	3	3	6	3	2	4	6	28	1.4	1.81
491	2	66	1.57	70.55	28.7	1	0	0	0	9	1	3	1	6	2	1	1	6	21	1.39	1.73
492	2	69	1.59	73.45	29.1	0	0	0	0	9	1	3	3	4	2	2	5	6	26	1.39	1.73
493	2	68	1.63	67.35	25.3	0	1	1	0	9	1	4	3	6	1	1	3	6	25	1.38	1.83
494	2	66	1.62	62.3	23.7	1	0	1	0	9	1	5	3	5	2	2	3	6	27	1.37	1.52
495	2	67	1.6	61.75	24.1	0	0	0	0	9	1	3	3	6	3	2	2	6	26	1.36	1.94
496	2	69	1.57	59	23.9	1	0	1	0	9	1	5	3	6	2	2	4	5	28	1.34	1.44
497	2	65	1.63	55.25	20.8	1	0	0	0	9	1	3	3	4	2	0	0	3	16	1.33	1.46
498	2	68	1.54	55.5	23	1	0	0	1	9	1	4	3	5	3	1	0	6	23	1.33	1.45
499	2	67	1.53	51.5	22.6	1	0	1	0	9	1	4	3	6	2	2	2	6	26	1.33	1.51
500	2	67	1.6	52.9	20.7	0	1	0	0	9	1	5	3	6	3	2	4	5	29	1.32	1.61
501	2	68	1.56	68.8	28.3	1	1	0	0	9	1	5	3	5	2	0	2	6	24	1.31	1.83
502	2	67	1.62	64.1	24.4	0	0	0	1	9	1	5	3	6	3	2	5	6	30	1.3	1.71
503	2	66	1.53	44.15	18.9	0	0	0	0	9	1	3	2	6	3	1	0	6	22	1.3	1.97
504	2	69	1.71	68.25	23.6	1	0	0	0	9	1	5	3	6	3	2	5	6	30	1.29	1.56
505	2	68	1.6	58.6	22.9	1	1	0	0	9	1	3	2	5	2	0	1	5	19	1.27	1.92
506	2	65	1.59	68.5	27.1	1	1	0	1	9	1	3	1	4	3	1	2	6	21	1.27	1.85
507	2	65	1.61	62.3	24	0	0	0	0	9	1	4	3	4	3	2	3	6	26	1.27	1.57
508	2	68	1.53	48.8	20.8	0	0	0	0	9	1	5	3	6	3	2	2	6	28	1.26	1.7
509	2	67	1.57	54.95	22.6	0	0	0	0	9	1	3	2	6	3	0	2	6	23	1.26	1.51
510	2	66	1.63	87.2	33	1	1	0	0	9	1	5	3	6	3	2	5	6	30	1.23	1.62
511	2	65	1.6	64.45	25.2	1	0	0	0	9	1	3	3	6	3	0	5	6	27	1.23	1.82
512	2	69	1.58	62.05	24.9	1	0	0	1	9	1	4	3	6	3	0	3	6	26	1.23	1.58
513	2	69	1.47	78.8	36.4	0	1	0	1	9	1	2	2	4	3	2	4	6	24	1.22	1.76
514	2	67	1.54	44.65	18.8	1	0	0	0	9	1	3	3	6	2	1	3	6	25	1.2	1.6
515	2	65	1.62	50.7	19.3	0	1	0	0	9	1	5	3	6	3	1	3	6	28	1.18	2.49
516	2	67	1.53	56	23.9	0	0	1	0	9	1	3	3	5	3	0	2	6	23	1.18	1.88
517	2	67	1.4	42.4	21.6	1	1	0	0	9	1	5	2	4	1	1	5	6	25	1.18	1.82
518	2	67	1.67	66	24	1	1	0	1	9	1	3	3	4	3	1	2	6	23	1.17	1.52
519	2	66	1.56	51.25	21.1	1	0	0	1	9	1	4	3	6	3	1	5	6	29	1.15	1.46
520	2	68	1.53	50.75	21.7	0	0	0	0	9	1	3	3	6	3	2	4	6	28	1.14	1.63
521	2	67	1.53	56.95	24.3	0	0	0	0	9	1	4	3	6	3	0	5	6	28	1.13	1.7
522	2	67	1.59	50.6	20	0	0	0	0	9	1	2	3	5	3	1	3	5	23	1.13	1.49
523	2	68	1.51	68.25	29.9	0	0	1	0	9	1	5	3	6	2	2	3	6	28	1.12	1.51
524	2	68	1.61	58.45	22.8	1	0	0	0	9	1	5	3	6	3	2	5	6	30	1.1	1.46
525	2	68	1.53	48.6	20.9	1	1	0	1	9	1	4	3	5	3	1	5	6	28	1.1	1.79
526	2	68	1.59	63.35	25.1	0	0	0	0	9	1	3	3	6	2	0	1	6	22	1.09	1.43
527	2	69	1.59	59.45	23.5	0	1	1	1	9	1	1	3	5	2	0	0	6	18	1.09	1.22
528	2	69	1.47	53.8	24.9	1	0	0	0	9	1	4	3	6	2	2	4	6	28	1.09	1.2
529	2	67	1.61	50.9	19.6	1	0	1	1	9	1	5	3	5	1	1	2	6	24	1.08	1.25
530	2	66	1.55	64.55	26.9	0	0	0	0	9	1	4	3	6	3	1	4	6	28	1.06	1.41
531	2	67	1.62	57.1	22.1	1	0	0	1	9	1	3	3	6	3	1	3	6	26	1.05	1.92
532	2	68	1.61	57.5	22.2	0	0	0	1	9	1	4	3	6	3	1	1	6	25	1.01	1.89
533	2	66	1.55	54.6	22.7	1	0	0	0	9	1	3	3	5	2	2	0	6	22	1.01	1.31
534	2	66	1.59	79.4	31.4	1	1	0	0	9	1	3	3	6	3	0	4	6	26	0.99	1.17
535	2	67	1.52	58.9	25.7	0	0	0	1	9	1	5	3	6	3	2	5	6	30	0.97	1.33
536	2	68	1.53	57.3	24.6	1	0	0	0	9	1	4	3	6	3	2	3	6	28	0.96	1.45
537	2	66	1.58	68.75	27.5	1	0	0	0	9	1	5	3	6	3	0	4	6	28	0.95	1.42
538	2	67	1.63	53.3	20.1	1	1	0	0	9	1	4	3	6	3	1	5	6	29	0.93	1.2
539	2	69	1.58	37.4	15	1	0	0	0	9	1	4	3	5	2	1	4	6	26	0.9	1.12
540	2	67	1.58	65.75	26.3	1	0	0	0	9	1	5	3	6	3	1	4	6	29	0.89	1.18
541	2	65	1.53	57.6	24.6	0	0	1	0	9	1	2	3	6	3	1	5	6	27	0.88	1.09
542	2	67	1.44	48.3	23.3	0	0	0	0	9	1	2	3	6	3	1	1	6	23	0.87	1.16
543	2	68	1.44	67.75	32.7	1	1	1	0	9	1	5	2	5	3	1	5	5	27	0.83	0.99
544	2	67	1.62	56.25	21.4	1	0	1	0	9	1	4	2	6	3	1	2	6	25	0.82	1.34
545	2	67	1.62	76.9	29.1	1	0	1	0	9	1	4	3	5	3	2	0	6	24	0.8	1.45
546	2	68	1.55	66.95	27.9	1	0	0	0	9	1	5	3	6	3	2	2	6	28	0.77	1.5
547	2	68	1.61	52.8	20.6	1	1	0	1	9	1	2	3	6	3	1	3	6	25	0.65	0.9
548	2	69	1.56	66.5	27.5	1	0	1	1	9	1	1	2	6	3	1	3	6	23	0.62	0.91
549	2	67	1.52	51.05	22.1	0	0	0	0	6	1	0	3	4	1	1	0	4	14	1.7	1.79
550	2	69	1.61	56.55	21.8	0	0	1	0	6	1	0	3	6	3	0	0	6	19	1.53	1.68
551	2	69	1.47	42.1	19.5	0	0	0	0	6	1	4	3	6	3	2	3	6	28	1.46	2
552	2	68	1.59	59.9	23.7	0	0	0	0	6	1	4	2	6	1	1	2	6	23	1.36	1.98
553	2	69	1.62	83.35	31.8	0	0	0	0	6	1	2	3	4	1	1	0	6	18	1.36	1.81
554	2	68	1.47	55.6	25.7	1	0	1	1	6	1	2	1	4	1	0	0	6	15	1.26	1.46
555	2	66	1.57	54.5	22.1	1	0	0	0	6	1	4	2	4	1	1	1	5	19	1.24	1.58
556	2	66	1.6	51.4	20.1	0	1	0	0	6	1	5	3	6	1	1	0	6	23	1.19	1.4
557	2	67	1.57	56.1	22.5	1	1	0	1	6	1	4	3	5	3	1	2	6	25	1.19	1.68
558	2	66	1.54	61.2	25.6	0	0	0	0	6	1	2	3	6	3	1	1	6	23	1.17	1.43
559	2	72	1.63	63.85	24	0	0	0	0	19	0	5	2	6	3	1	4	6	27	1.55	1.75
560	2	74	1.56	55.4	22.8	1	1	1	0	19	0	5	3	6	3	2	5	6	30	1.44	1.89
561	2	73	1.5	48.35	21.5	0	1	0	1	19	0	5	3	6	3	2	4	6	29	1.34	1.94
562	2	70	1.63	54.45	20.7	0	0	0	0	19	0	4	3	6	3	2	2	6	26	1.31	2.23
563	2	72	1.61	71.3	27.4	1	1	0	1	19	0	1	3	6	3	2	3	6	24	1.24	1.65
564	2	70	1.68	72.2	25.6	1	0	0	0	19	0	4	3	6	3	2	4	6	28	1.21	1.96
565	2	72	1.57	54.2	22	0	0	0	0	19	0	5	2	6	2	2	5	6	28	1.18	1.85
566	2	71	1.52	61.25	26.5	0	1	0	0	19	0	5	3	6	3	2	3	6	28	1.15	1.54
567	2	73	1.59	64.9	25.7	1	0	0	0	19	0	5	3	6	3	2	5	6	30	1.11	1.64
568	2	70	1.57	51.8	21	0	0	0	0	16	0	4	3	6	3	1	3	6	26	1.55	1.7
569	2	71	1.55	61.6	25.4	1	1	1	0	16	0	4	3	6	3	1	3	6	26	1.4	1.6
570	2	74	1.62	66.2	25.4	1	0	1	1	16	0	4	3	6	3	1	3	6	26	1.24	1.65
571	2	74	1.65	59.59	21.9	1	1	0	0	16	0	4	3	6	3	1	3	6	26	1.24	1.65
572	2	70	1.56	55.25	22.7	0	0	0	0	16	0	4	3	6	3	1	3	6	26	1.16	1.78
573	2	72	1.53	51.2	21.9	1	0	1	0	16	0	4	3	6	3	1	3	6	26	1.12	1.66
574	2	74	1.62	66.6	25.4	1	1	0	0	16	0	4	3	6	3	1	3	6	26	0.9	1.3
575	2	73	1.48	56.95	26	1	1	1	1	16	0	4	3	6	3	1	3	6	26	0.62	0.73
576	2	70	1.59	54.25	21.5	0	0	0	0	16	0	4	3	6	3	2	1	5	24	1.61	1.81
577	2	74	1.68	59.8	21.2	1	0	0	0	16	0	5	3	6	3	2	5	6	30	1.53	1.74
578	2	73	1.67	63.5	23	0	0	0	0	16	0	5	3	6	3	0	0	6	23	1.49	1.76
579	2	73	1.59	58.45	23.4	0	1	0	0	16	0	5	3	6	3	1	2	6	26	1.49	1.7
580	2	71	1.54	57.5	23.6	1	0	1	0	16	0	5	3	6	3	2	4	6	29	1.47	1.72
581	2	74	1.62	67.45	25.7	1	0	0	1	16	0	5	3	6	3	2	3	6	28	1.47	1.6
582	2	73	1.56	72.5	29.8	1	0	0	0	16	0	5	3	6	3	2	3	6	28	1.42	2.18
583	2	71	1.62	63.7	24.4	1	0	0	0	16	0	3	3	6	3	2	4	6	27	1.33	1.69
584	2	74	1.53	48.9	20.9	0	0	1	1	16	0	4	3	6	3	2	4	6	28	1.3	1.97
585	2	73	1.58	58	23.2	1	1	1	1	16	0	5	3	6	3	2	0	5	24	1.22	1.67
586	2	70	1.66	61.6	22.3	0	1	1	1	16	0	4	3	6	3	2	5	6	29	1.19	1.66
587	2	74	1.55	44.85	18.9	0	1	0	0	16	0	5	3	6	3	2	0	6	25	1.18	1.31
588	2	72	1.5	47.05	20.9	1	0	0	0	16	0	4	2	6	3	2	3	6	26	1.16	1.61
589	2	73	1.65	68.1	25	1	0	0	0	16	0	5	3	5	3	2	5	6	29	1.08	1.52
590	2	70	1.55	51.6	20.8	1	0	1	1	16	0	5	2	6	3	2	4	6	28	1.03	1.96
591	2	71	1.63	64	24	1	0	0	0	12	1	5	3	6	3	2	3	6	29	1.76	1.82
592	2	74	1.54	52.3	22.1	0	0	1	1	12	1	2	3	6	2	2	0	6	22	1.59	2.11
593	2	73	1.65	73.6	27.4	1	1	1	0	12	1	4	3	5	3	2	1	6	25	1.58	1.88
594	2	70	1.54	53	22.4	0	0	1	1	12	1	5	3	5	3	1	4	6	28	1.5	1.8
595	2	73	1.56	60.95	25	1	0	1	0	12	1	5	3	6	3	2	3	6	29	1.5	1.8
596	2	74	1.64	59.15	22	1	0	0	0	12	1	5	3	6	3	2	3	6	29	1.49	1.9
597	2	73	1.57	57.95	22.6	0	0	0	1	12	1	4	3	6	3	1	2	6	26	1.44	2.08
598	2	74	1.46	61.3	29	1	1	1	1	12	1	4	3	5	2	1	2	6	24	1.44	1.87
599	2	73	1.61	59.3	22.9	0	0	0	0	12	1	2	3	5	3	1	4	6	25	1.43	2.4
600	2	74	1.6	40.85	16	0	0	0	1	12	1	4	3	6	3	0	5	6	28	1.42	2.2
601	2	74	1.58	45.05	18	0	0	0	1	12	1	5	3	6	3	2	5	6	30	1.42	1.79
602	2	72	1.64	58.2	21.6	0	0	0	0	12	1	4	3	6	3	0	3	6	26	1.42	1.44
603	2	74	1.51	49.9	21.9	1	0	1	0	12	1	3	3	6	3	1	5	6	28	1.41	1.69
604	2	73	1.6	62.75	24.5	1	0	0	0	12	1	5	3	6	3	2	2	6	28	1.39	1.65
605	2	71	1.54	45.2	19.1	1	0	0	1	12	1	5	3	5	3	2	5	6	30	1.36	1.76
606	2	73	1.61	57.5	22.2	1	0	1	0	12	1	4	3	6	2	2	4	6	28	1.3	1.92
607	2	71	1.54	75.45	31.8	1	0	0	0	12	1	5	3	6	3	2	4	6	30	1.29	2.03
608	2	73	1.5	38.55	17.1	0	0	0	0	12	1	5	3	6	2	2	4	6	29	1.26	1.82
609	2	74	1.61	66.5	25.7	1	0	0	1	12	1	4	2	6	3	1	2	6	25	1.24	1.48
610	2	72	1.58	58.2	22.7	1	0	0	0	12	1	2	3	5	3	2	5	6	27	1.24	1.65
611	2	73	1.5	51.4	22.6	0	0	0	0	12	1	5	3	6	3	2	4	6	30	1.24	1.65
612	2	73	1.74	77.8	26.2	1	0	0	0	12	1	4	3	5	2	2	4	6	27	1.24	1.65
613	2	74	1.54	60.35	25.4	0	1	0	1	12	1	5	3	6	2	2	5	6	30	1.18	1.65
614	2	71	1.54	49.85	21.3	1	0	0	1	12	1	5	3	2	3	1	4	6	25	1.17	1.81
615	2	72	1.53	63.2	27	0	0	0	0	12	1	5	3	6	3	2	3	6	29	1.08	1.64
616	2	73	1.56	48.2	19.8	0	0	1	0	12	1	3	3	6	3	2	3	5	26	1.06	1.46
617	2	74	1.47	48.1	22.3	0	0	0	0	12	1	5	3	6	3	2	4	6	30	1.04	1.62
618	2	71	1.58	53.8	21.6	0	0	0	0	12	1	5	3	6	3	0	3	6	27	1.04	1.38
619	2	73	1.64	67.4	25.1	0	0	0	0	12	1	4	3	6	3	1	4	6	28	0.96	1.19
620	2	73	1.51	38.8	17.1	0	0	0	1	12	1	3	3	6	3	1	2	6	25	0.93	1.1
621	2	74	1.5	47	20.9	0	0	1	0	12	1	4	3	6	3	2	5	6	30	0.79	0.91
622	2	73	1.42	38.8	19.1	1	1	0	1	12	1	4	3	3	3	1	2	6	23	0.72	1.14
623	2	74	1.48	79.1	36.4	1	0	0	1	12	1	5	3	6	3	2	5	6	30	0.59	0.89
624	2	72	1.66	72.1	26.2	0	0	0	0	9	1	4	3	6	3	2	4	6	29	1.6	1.95
625	2	72	1.51	65.75	28.8	0	0	0	0	9	1	2	3	5	3	1	4	5	24	1.55	1.95
626	2	72	1.58	40.55	16.4	0	0	1	0	9	1	5	3	5	3	1	4	5	27	1.53	1.74
627	2	70	1.53	57.65	24.6	1	0	0	0	9	1	3	3	5	3	1	1	6	23	1.49	2.02
628	2	74	1.55	56.9	23.7	0	0	0	0	9	1	4	2	4	3	1	2	6	23	1.49	1.77
629	2	74	1.54	42.15	17.8	0	0	0	1	9	1	5	2	6	2	1	3	6	26	1.48	2.11
630	2	70	1.49	52.65	23.7	0	0	0	0	9	1	5	3	5	3	1	3	5	26	1.48	1.99
631	2	74	1.52	54	23.7	0	0	0	0	9	1	3	3	6	2	2	5	6	28	1.41	1.79
632	2	73	1.63	69.5	26.2	0	0	0	0	9	1	4	3	4	3	2	3	6	26	1.4	1.9
633	2	71	1.5	58.1	25.6	0	0	1	1	9	1	3	3	5	3	2	3	6	26	1.38	1.47
634	2	70	1.61	57.35	22.4	0	0	0	0	9	1	1	3	6	3	0	0	6	20	1.35	1.81
635	2	71	1.55	57	23.7	1	1	0	0	9	1	5	3	6	3	1	4	6	29	1.35	1.71
636	2	73	1.53	64.5	27.6	0	0	0	0	9	1	1	3	6	3	0	1	6	21	1.33	1.56
637	2	71	1.63	54.8	20.5	0	0	0	1	9	1	4	3	5	3	1	2	6	25	1.3	1.6
638	2	71	1.6	70.75	27.6	1	0	0	1	9	1	5	3	6	3	1	5	6	30	1.24	1.8
639	2	70	1.63	76.75	25.5	1	0	0	0	9	1	5	3	5	2	1	2	6	25	1.24	1.96
640	2	72	1.55	57.1	23.6	1	0	0	0	9	1	4	3	6	2	2	4	6	28	1.24	1.65
641	2	72	1.57	69.2	28.5	1	1	0	0	9	1	2	3	6	3	2	3	6	26	1.24	1.65
642	2	72	1.72	84.4	28.5	0	0	0	0	9	1	3	3	6	3	2	1	1	20	1.24	1.65
643	2	70	1.62	75.55	28.8	0	0	0	0	9	1	3	3	6	3	2	2	6	26	1.22	1.78
644	2	71	1.52	49.4	21.4	0	0	0	0	9	1	5	3	6	3	0	2	5	25	1.22	1.76
645	2	72	1.57	67.7	27.5	1	0	0	0	9	1	5	3	6	3	0	5	6	29	1.2	1.47
646	2	71	1.58	63.25	25.3	1	0	0	0	9	1	2	2	6	2	0	3	6	22	1.17	1.85
647	2	74	1.58	80.6	32.7	1	0	1	1	9	1	4	3	6	3	0	0	5	22	1.17	1.81
648	2	70	1.63	70.15	26.4	0	0	0	1	9	1	5	3	6	3	2	4	5	29	1.15	1.43
649	2	74	1.57	55.6	22.6	1	0	0	1	9	1	1	3	6	3	1	3	6	24	1.15	1.62
650	2	73	1.53	46.7	19.9	1	0	0	0	9	1	4	3	6	2	2	4	6	28	1.14	1.36
651	2	71	1.56	53.8	22.2	0	0	1	0	9	1	4	3	6	3	2	5	6	30	1.11	1.69
652	2	71	1.55	49.1	20.2	0	0	1	1	9	1	5	3	6	3	2	3	6	29	1.08	1.63
653	2	70	1.57	66.05	26.5	0	0	0	1	9	1	0	3	5	3	2	5	6	25	1.08	1.74
654	2	71	1.58	76	30.4	1	0	1	0	9	1	5	3	5	3	1	4	6	28	1.06	1.41
655	2	72	1.54	46.1	19.4	0	0	1	0	9	1	5	3	6	3	2	4	6	30	0.99	1.69
656	2	71	1.61	73.65	28.4	0	1	0	0	9	1	4	3	6	3	2	3	6	28	0.96	1.21
657	2	71	1.51	68.7	30.1	1	0	0	0	9	1	5	3	5	3	1	2	6	26	0.94	1.57
658	2	71	1.51	76.8	23.7	1	0	0	0	9	1	3	3	4	2	2	3	6	24	0.9	1.05
659	2	72	1.5	51.2	22.8	0	0	0	0	9	1	4	3	6	3	1	4	6	28	0.85	0.97
660	2	73	1.51	66.15	29	0	0	1	0	9	1	3	3	6	3	2	5	6	29	0.85	1.05
661	2	70	1.62	59.85	23.1	0	0	0	0	9	1	5	3	6	3	2	2	6	28	0.84	1.02
662	2	73	1.54	66.7	28.5	1	1	1	0	9	1	3	3	5	0	0	1	5	18	0.76	1.03
663	2	70	1.58	60.2	24.1	1	0	0	0	9	1	3	3	6	3	2	3	6	27	0.76	0.97
664	2	71	1.49	52.85	22.6	1	0	0	0	6	1	3	2	4	3	0	1	5	19	1.55	1.84
665	2	74	1.59	59.05	23.4	0	0	0	0	6	1	2	3	6	2	1	4	6	25	1.49	1.98
666	2	73	1.56	66.35	27.3	1	1	0	0	6	1	4	3	6	2	1	0	6	23	1.37	1.79
667	2	74	1.58	54.4	21.8	1	1	0	0	6	1	3	3	3	1	1	3	6	21	1.28	1.55
668	2	71	1.51	82.9	36.4	1	1	0	1	6	1	3	3	6	1	0	0	6	20	1.1	1.36
669	2	71	1.56	48.05	20	0	0	1	1	6	1	4	2	6	1	1	4	6	25	1.01	1.87
670	2	70	1.65	68.3	25.4	0	0	0	0	6	1	1	1	1	1	1	1	3	10	0.87	1
671	2	73	1.59	61.35	24.3	1	0	1	1	6	1	3	3	4	2	1	1	6	21	0.84	1.04
672	2	77	1.53	41.25	17.6	0	0	0	0	19	0	5	3	5	3	2	5	6	29	1.92	2.28
673	2	75	1.55	66.8	27.8	1	0	0	0	19	0	5	3	6	3	2	0	6	25	1.48	1.93
674	2	79	1.66	73.45	26.7	0	0	0	0	19	0	5	3	6	2	1	2	6	25	1.32	1.5
675	2	77	1.62	51.35	19.8	1	0	0	1	19	0	5	3	6	3	2	5	6	30	1.25	1.7
676	2	78	1.55	56.3	23.4	1	0	0	0	19	0	5	3	6	3	2	5	6	30	1.19	1.39
677	2	76	1.54	47.3	19.9	0	0	1	1	19	0	5	3	6	3	2	4	6	29	1.13	1.33
678	2	78	1.51	53.35	23.7	1	0	0	1	19	0	5	3	4	3	2	5	5	27	0.82	1.27
679	2	75	1.52	54.15	23.4	1	1	1	1	19	0	5	3	6	3	2	3	6	28	0.75	0.86
680	2	79	1.53	54.9	23.4	1	0	1	0	19	0	5	3	6	3	2	4	6	29	0.75	0.9
681	2	77	1.5	44.8	19.9	0	0	0	0	19	0	4	2	6	3	1	0	6	22	0.57	1.07
682	2	78	1.57	64.05	26	1	0	1	0	16	0	2	0	6	2	0	0	6	16	0.96	1.33
683	2	77	1.61	77.75	30	1	0	0	0	16	0	4	3	5	3	3	3	6	27	0.78	0.93
684	2	75	1.58	58.9	23.6	0	0	0	0	16	0	5	3	6	3	0	1	5	23	1.32	1.56
685	2	78	1.56	59.5	24.8	1	0	0	0	16	0	5	3	3	3	2	5	6	27	1.29	1.53
686	2	76	1.51	56.6	24.6	1	0	0	0	16	0	3	3	5	3	2	5	6	27	1.27	1.65
687	2	78	1.53	59.7	25.8	0	0	0	0	16	0	3	3	6	3	2	3	6	26	1.27	1.63
688	2	75	1.52	51.2	21.9	0	1	1	1	16	0	5	3	5	3	2	4	6	28	1.14	1.43
689	2	75	1.55	56.75	23.6	0	0	1	0	16	0	4	2	6	3	2	1	6	24	1.13	1.24
690	2	76	1.62	62.9	24	1	1	0	1	16	0	5	3	6	3	2	3	6	28	1.09	1.16
691	2	75	1.6	64	24.9	1	0	0	0	16	0	4	3	6	3	1	1	5	23	1.05	1.67
692	2	76	1.63	76.25	28.7	1	0	0	0	12	1	3	3	4	2	2	3	6	24	1.43	1.67
693	2	76	1.63	54.45	20.7	0	0	0	0	12	1	5	3	6	3	2	5	6	30	1.35	1.97
694	2	75	1.44	45.7	22	0	0	0	0	12	1	5	3	6	3	1	3	6	28	1.31	2.34
695	2	75	1.44	45.7	22	0	0	0	0	12	1	5	3	6	3	1	3	6	28	1.31	2.34
696	2	75	1.61	58.9	23	1	1	0	0	12	1	3	3	6	3	2	0	6	24	1.28	2.15
697	2	75	1.62	65.5	24.5	0	0	0	1	12	1	2	2	3	2	0	2	6	18	1.25	1.61
698	2	79	1.58	54.05	21.7	0	0	0	0	12	1	5	2	6	3	0	2	6	25	1.24	1.49
699	2	76	1.55	57.8	24.1	1	1	0	0	12	1	4	3	5	3	2	3	5	26	1.23	1.74
700	2	76	1.55	57.8	24.1	1	1	0	0	12	1	4	3	5	3	2	3	5	26	1.23	1.74
701	2	75	1.63	58.85	22.1	0	0	0	0	12	1	5	3	6	3	1	2	6	27	1.22	1.53
702	2	75	1.55	60	24.7	0	0	1	0	12	1	1	3	6	3	2	4	6	26	1.14	1.5
703	2	76	1.58	75.95	30.4	1	0	0	1	12	1	4	3	6	3	2	4	6	29	1.13	1.33
704	2	77	1.47	42.05	19.5	1	0	1	1	12	1	4	3	6	3	2	5	6	30	1.09	1.4
705	2	78	1.54	68.2	28.6	1	0	0	1	12	1	4	3	5	2	1	4	6	26	1.06	1.42
706	2	79	1.45	48.6	23.1	1	0	1	1	12	1	5	3	5	3	2	0	6	25	1.03	1.78
707	2	78	1.59	75	29.7	1	0	0	0	12	1	5	3	6	3	1	1	6	26	1.02	1.81
708	2	77	1.59	52	20.6	1	0	0	0	12	1	4	3	5	3	2	2	6	26	1.01	1.31
709	2	76	1.54	70.1	29.6	1	0	0	0	12	1	3	3	6	3	2	2	6	26	0.97	1.02
710	2	79	1.46	53.55	25.1	1	1	1	1	12	1	3	3	6	3	0	0	6	22	0.96	1.23
711	2	75	1.56	54.35	22.3	1	1	1	1	12	1	4	3	6	3	1	3	6	27	0.96	1.22
712	2	76	1.55	54.45	22.7	0	0	0	1	12	1	3	3	6	2	0	2	6	23	0.92	1.08
713	2	78	1.58	60.9	24.4	1	1	0	1	9	1	2	3	6	1	2	4	6	25	1.5	1.69
714	2	75	1.57	64.9	26.3	1	0	1	0	9	1	5	3	6	3	2	5	5	30	1.39	1.83
715	2	79	1.51	71.25	31.2	1	0	0	0	9	1	1	3	0	1	0	3	5	14	1.38	1.57
716	2	79	1.51	71.25	31.2	1	0	0	0	9	1	1	3	0	1	0	3	5	14	1.38	1.57
717	2	75	1.64	65.5	24.8	1	0	0	0	9	1	1	3	4	2	2	2	6	21	1.3	1.52
718	2	75	1.52	60.8	26.3	1	0	0	1	9	1	1	1	2	1	0	3	6	15	1.29	1.54
719	2	78	1.5	51.5	22.9	0	0	1	1	9	1	4	3	5	3	2	3	6	27	1.25	1.76
720	2	78	1.5	51.5	22.9	0	0	1	1	9	1	4	3	5	3	2	3	6	27	1.25	1.76
721	2	75	1.56	57.5	23.3	0	0	1	1	9	1	5	3	6	3	2	4	5	29	1.21	1.75
722	2	79	1.53	56.9	24.3	1	0	0	1	9	1	5	2	6	3	2	4	6	29	1.16	1.92
723	2	76	1.51	58.25	25.5	1	1	0	0	9	1	5	3	6	3	1	3	6	28	1.15	1.92
724	2	77	1.46	40.4	19	0	0	0	0	9	1	3	2	6	3	2	2	6	25	0.88	1.11
725	2	78	1.55	55.9	23.6	0	0	1	0	9	1	5	3	6	3	2	5	6	30	0.77	1.35
726	2	76	1.55	67.6	28.1	1	1	0	1	9	1	4	3	6	3	1	3	6	27	0.77	1.05
727	2	75	1.52	63.3	27.4	1	1	0	0	9	1	2	2	4	2	1	0	4	16	0.57	0.73
728	2	75	1.52	63.3	27.4	1	1	0	0	9	1	2	2	4	2	1	0	4	16	0.57	0.73
729	2	77	1.68	64.55	22.9	1	0	0	0	6	1	4	3	3	2	0	1	6	20	1.66	1.86
730	2	77	1.68	64.55	22.9	1	0	0	0	6	1	4	3	3	2	0	1	6	20	1.66	1.86
731	2	75	1.6	60.95	23.8	0	0	1	1	6	1	3	3	6	1	1	2	6	23	1.31	1.54
732	2	78	1.38	49.75	26.1	0	0	0	1	6	1	4	1	1	2	1	4	6	20	1.13	1.32
733	2	78	1.38	49.75	26.1	0	0	0	1	6	1	4	1	1	2	1	4	6	20	1.13	1.32
734	2	75	1.55	67.35	28	1	1	0	0	6	1	3	3	6	1	0	0	6	20	0.65	0.73
735	2	76	1.57	59.4	24.1	1	1	0	0	0	1	2	3	6	3	0	2	6	23	1.32	1.5
736	2	80	1.6	62.85	24.6	0	0	0	0	19	0	5	3	6	3	2	5	6	30	1.48	2
737	2	81	1.57	65.6	27	0	0	0	0	19	0	5	3	6	3	2	2	6	27	1.39	1.64
738	2	83	1.58	54.85	22.3	1	0	0	0	19	0	5	3	6	2	2	0	3	21	1.26	1.56
739	2	83	1.48	38.75	17.9	0	1	1	0	19	0	4	3	6	2	0	3	5	23	1	1.55
740	2	81	1.56	62.15	25.5	0	0	1	0	19	0	5	3	6	3	2	4	6	29	0.96	1.47
741	2	80	1.55	45.5	18.9	1	0	0	1	19	0	5	3	6	3	2	4	6	29	0.92	1.02
742	2	82	1.47	46.95	21.7	0	0	0	1	19	0	5	3	6	2	2	2	6	26	0.57	0.73
743	2	83	1.46	67.5	31.6	1	0	0	0	16	0	3	3	1	2	1	2	4	16	1.04	1.28
744	2	83	1.53	49.2	21	0	1	0	1	16	0	3	2	4	2	1	2	5	19	0.58	1.01
745	2	82	1.54	63.55	26.8	0	0	0	0	16	0	5	3	5	3	2	5	6	29	1.34	1.52
746	2	82	1.54	63.55	26.8	0	0	0	0	16	0	5	3	5	3	2	5	6	29	1.34	1.52
747	2	81	1.56	70.05	28.8	1	1	1	1	16	0	3	3	4	3	2	3	6	24	0.64	0.95
748	2	80	1.55	53.45	22.2	1	0	0	0	12	1	4	3	4	3	0	0	6	21	1.54	1.72
749	2	84	1.5	50.95	22.6	1	0	0	1	12	1	2	2	5	2	0	2	6	20	1.5	1.82
750	2	83	1.65	60.35	23	0	0	0	1	12	1	2	2	3	3	2	4	6	23	1.48	1.92
751	2	82	1.59	67.9	26.9	0	0	0	0	12	1	0	3	5	3	1	3	6	22	1.23	1.63
752	2	83	1.53	79.6	34	0	0	0	0	12	1	2	2	4	2	1	2	2	16	1.04	1.28
753	2	81	1.56	49.8	20.5	1	0	0	0	12	1	4	3	6	3	1	3	6	27	0.93	1.01
754	2	81	1.68	60.1	21.3	1	0	0	1	12	1	3	3	5	3	2	4	6	27	0.92	1.61
755	2	83	1.56	66.25	27.2	0	0	1	0	12	1	5	1	5	3	2	2	6	25	0.69	0.83
756	2	84	1.59	66.3	26.1	1	0	1	1	12	1	1	0	6	3	2	0	6	19	0.65	0.88
757	2	84	1.49	71.9	32.5	1	0	1	1	9	1	3	2	4	2	1	2	5	20	0.85	1.19
758	2	83	1.54	54.25	22.9	0	0	0	0	9	1	3	2	1	1	0	0	5	13	0.76	0.88
759	2	80	1.56	77.8	32	1	0	0	1	9	1	4	3	4	3	1	2	6	24	1.69	1
760	2	81	1.49	62.5	28	1	0	0	0	9	1	3	2	5	1	2	0	6	20	1.13	1.27
761	2	83	1.56	54.15	22.3	1	0	0	0	9	1	3	2	6	3	2	3	6	26	0.99	1.19
762	2	81	1.57	60.05	24.4	0	0	0	1	9	1	4	3	5	3	2	2	5	25	0.99	1.33
763	2	80	1.53	52.1	22.3	1	1	1	1	9	1	4	3	4	1	2	4	5	24	0.97	1.25
764	2	83	1.54	69.05	29.1	1	0	0	0	9	1	2	3	5	3	1	3	6	24	0.89	1.08
765	2	82	1.58	68.15	27.3	1	1	0	0	6	1	0	3	5	1	1	0	6	17	1.37	1.5
766	2	82	1.58	68.15	27.3	1	1	0	0	6	1	0	3	5	1	1	0	6	17	1.37	1.5
767	2	82	1.58	71.15	28.5	1	1	0	0	6	1	1	1	1	3	0	0	4	11	1.09	1.32
768	2	82	1.58	71.15	28.5	1	1	0	0	6	1	1	1	1	3	0	0	4	11	1.09	1.32
769	2	84	1.47	49	22.7	0	0	0	0	6	1	0	3	4	3	0	4	5	20	0.89	1.16
770	2	81	1.49	37.8	16.9	1	0	0	0	6	1	3	2	4	2	1	2	5	20	0.78	0.78
771	2	80	1.57	71.3	28.9	1	0	0	0	6	1	3	3	4	0	1	3	5	20	0.71	0.79
772	2	80	1.52	53.95	23.4	1	0	0	1	0	1	1	2	3	0	0	0	5	12	1.09	1.55
773	2	84	1.54	58.7	24.8	1	0	0	1	0	1	0	2	4	2	2	4	6	21	0.89	1.24
774	2	83	1.51	52.3	22.9	1	0	0	1	0	1	1	1	4	1	0	0	2	10	0.57	0.73
775	2	86	1.64	76.4	28.4	0	0	0	1	19	0	5	3	6	2	2	5	6	29	1.04	1.28
776	2	86	1.53	51.2	21.9	1	1	0	0	19	0	3	3	6	3	0	3	6	24	0.77	1
777	2	86	1.38	44.1	23.2	0	1	0	0	16	0	3	3	1	2	1	2	6	18	0.91	1.04
778	2	87	1.42	53.15	26.4	0	0	0	1	16	0	3	3	6	2	2	1	6	23	0.81	1.06
779	2	85	1.5	47	20.9	1	0	0	1	16	0	1	1	2	1	0	1	4	10	0.57	0.74
780	2	88	1.47	55.9	25.9	1	0	0	1	12	1	4	3	6	3	2	4	6	29	1.03	1.35
781	2	88	1.59	58.7	22.8	1	0	0	1	12	1	2	3	6	3	2	3	6	26	0.81	1.06
782	2	86	1.51	58.9	25.7	0	1	0	0	12	1	4	3	3	3	2	1	6	23	0.57	0.73
783	2	87	1.46	46.75	21.9	1	0	0	0	9	1	0	2	3	0	1	1	2	10	1.04	1.3
784	2	87	1.54	49.2	20.7	0	0	0	0	9	1	5	3	6	3	0	0	6	24	1	1.69
785	2	86	1.57	68.4	27.7	1	0	0	0	9	1	3	3	6	1	1	3	5	23	0.79	1.01
786	2	86	1.6	59.8	23.4	1	1	1	1	6	1	3	3	6	2	2	1	6	24	0.95	1
787	2	85	1.53	64.95	27.7	1	0	0	1	6	1	3	3	6	3	2	3	6	27	0.73	0.99
788	2	87	1.53	55.5	24.3	1	0	0	1	6	0	3	2	6	2	2	0	6	21	0.61	0.91
789	2	86	1.51	56.47	37.4	0	0	0	0	0	0	2	3	4	3	1	0	6	19	0.91	1.02
790	2	87	1.45	59	28.3	1	0	1	1	0	1	0	2	3	0	0	0	6	12	0.77	1.01
791	2	88	1.51	54.5	23.9	1	1	0	0	0	1	3	3	2	2	1	2	1	15	0.57	0.87
